# Supplementary material
Source: publisher figshare collection journal article supplement (https://rs.figshare.com/ndownloader/files/13469363)
Supplement: Supplementary file 1 [file 13469363]

## Sheet: Sheet1
HUMAN_SiteID	HUMAN_Protein Name	HUMAN_Uniprot ID	HUMAN_NCBI Number	HUMAN_Psite Position	HUMAN_Psite AA Sequence	HUMAN_Psite AA Type	HUMAN_Size (Da)	HUMAN_Total Number of AA	CAEEL_Uniprot ID	CAEEL_NCBI Number		CAEEL_Percent Protein AA Identity with Human	CAEEL_Percent Protein AA Similarity with Human	CAEEL_Psite Position	CAEEL__Psite AA Sequence	CAEEL_Percent Psite AA Identity	CAEEL_Percent Psite AA Similarity	CAEEL_Psite AA Type	CAEEL_Size (Da)	CAEEL_Total Number of AA	Kinase Predictor Scores for CAEEL Psites
																					Q9TXJ0	Q14012	Q6P2M8	Q96NX5	Q8IU85	Q16566
											CAEL_gene										CAMK1 Worm	CaMK1a Human	CAMK1b Human	CAMK1g Human	CaMK1d Human	CAMK4 Human
Q07020 S183	RPL18	Q07020	NP_000970.1	S183	RARGRRASRGYKN__	Ser	21634	188	O45946		rpl-18	65.96	75	S183	RARGRRASRAYKN__	92.31	92.31	Ser	20978	188	124.434	238.025	226.519	219.924	226.699	195.554
O75494 S133	SFRS13A	O75494	NP_006616.1	S133	RRRSRSRSFDYNYRR	Ser	31301	262	Q09511		rsp-4	35.11	48.85	Y68	GFGFVRFYERRDAEH	0	6.67	Tyr	22569	196	123.101	279.866	314.647	262.089	313.375	217.615
O75146 S268	HIP1R	O75146	NP_003950.1	S268	RNFFRRASDMLYFKR	Ser	119388	1068	Q02328		hipr-1	33.33	50.28	T239	GHRSRFRTIFERTKK	13.33	33.33	Thr	104410	927	122.093	226.314	210.799	208.322	212.353	181.729
Q15139 S205	PRKD1	Q15139	NP_002733.2	S205	GVRRRRLSNVSLTGV	Ser	101704	912	O45818		dkf-2	43.74	56.26	S380	GSKQRRPSAIPLSPS	33.33	60	Ser	120565	1070	121.827	233.202	232.393	213.161	225.456	198.664
O95363 S426	FARS2	O95363	NP_006558.1	S426	RHMERTLSQREVRHI	Ser	52357	451		NP_507852	fars-2	46.72	64.41	T434	RSHERALTKEEVNVI	46.67	60	Thr	52705	458	121.478	241.715	204.898	191.389	223.028	224.879
P62330 Y150	ARF6	P62330	NP_001654.1	Y150	RIRDRNWYVQPSCAT	Tyr	20082	175	Q10943		arf-1.2	67.96	82.32	Y154	SLRNRSWYIQATCAT	53.33	86.67	Tyr	20503	181	119.765	176.458	167.727	160.081	163.485	154.579
O43304 S377	SEC14L5	O43304	NP_055507.1	S377	RQLGRPISSWTCLLD	Ser	78942	696	Q03606		T23G5.2	45.06	64.81	S390	RKLGTPISSWSLVVD	60	86.67	Ser	81064	719	117.721	297.899	260.106	272.705	264.775	232.356
P17081 S77	RHOQ	P17081	NP_036381.2	S77	YDRLRPLSYPMTDVF	Ser	22659	205	Q05062		cdc-42	62.44	76.1	S71	YDRLRPLSYPQTDVF	93.33	93.33	Ser	21147	191	117.296	228.408	218.232	202.468	216.899	184.638
Q53H12 S285	AGK	Q53H12	NP_060708.1	S285	RILRRLASYWAQPQD	Ser	47137	422	Q10123		F52C9.3	22.1	39.86	T293	WRWWHVLTGTPKYKN	0	33.33	Thr	49955	439	116.621	321.238	276.297	288.919	284.298	260.02
P05129 S241	PRKCG	P05129	NP_002730.1	S241	GDVERRLSVEVWDWD	Ser	78448	697	P90980		pkc-2	60.69	74.61	S244	GDKDRRLSIEVWDWD	80	93.33	Ser	77982	682	115.662	228.797	227.826	206.277	217.379	189.052
P61586 S73	RHOA	P61586	NP_001655.1	S73	YDRLRPLSYPDTDVI	Ser	21768	193	Q22038		rho-1	87.56	94.82	S73	YDRLRPLSYPDTDVI	100	100	Ser	21617	192	115.303	222.123	209.808	196.144	210.619	178.232
P62745 S73	RHOB	P62745	NP_004031.1	S73	YDRLRPLSYPDTDVI	Ser	22123	196	Q22038		rho-1	78.57	88.27	S73	YDRLRPLSYPDTDVI	100	100	Ser	21617	192	115.303	222.123	209.808	196.144	210.619	178.232
P08134 S73	RHOC	P08134	NP_001036143.1	S73	YDRLRPLSYPDTDVI	Ser	22006	193	Q22038		rho-1	84.46	91.71	S73	YDRLRPLSYPDTDVI	100	100	Ser	21617	192	115.303	222.123	209.808	196.144	210.619	178.232
P60953 S71	CDC42	P60953	NP_001034891.1	S71	YDRLRPLSYPQTDVF	Ser	21311	191	Q05062		cdc-42	86.39	94.76	S71	YDRLRPLSYPQTDVF	100	100	Ser	21147	191	115.143	225.918	213.739	199.981	214.407	182.112
P63000 S71	RAC1	P63000	NP_008839.2	S71	YDRLRPLSYPQTDVF	Ser	21450	192	Q03206		ced-10	82.81	91.67	S71	YDRLRPLSYPQTDVF	100	100	Ser	21436	191	115.143	225.918	213.739	199.981	214.407	182.112
P15153 S71	RAC2	P15153	NP_002863.1	S71	YDRLRPLSYPQTDVF	Ser	21429	192	Q03206		ced-10	79.69	91.15	S71	YDRLRPLSYPQTDVF	100	100	Ser	21436	191	115.143	225.918	213.739	199.981	214.407	182.112
P60763 S71	RAC3	P60763	NP_005043.1	S71	YDRLRPLSYPQTDVF	Ser	21379	192	Q03206		ced-10	81.77	90.63	S71	YDRLRPLSYPQTDVF	100	100	Ser	21436	191	115.143	225.918	213.739	199.981	214.407	182.112
O95819 T187	MAP4K4	O95819	NP_004825.2	T187	RTVGRRNTFIGTPYW	Thr	142101	1239	Q23356		mig-15	49.48	62.63	T185	KTVGRRNTFIGTPYW	93.33	100	Thr	122486	1096	112.604	216.871	201.876	210.194	210.207	176.778
P62081 T123	RPS7	P62081	NP_001002.1	T123	RPRSRTLTAVHDAIL	Thr	22127	194	Q23312		rps-7	58.25	76.8	T123	RPRSRTLTAVHDAWL	93.33	93.33	Thr	22039	194	111.754	211.837	222.173	180.683	215.232	151.814
P57053 S37	H2BFS	P57053	NP_542160	S37	RKRSRKESYSVYVYK	Ser	13944	126	Q27894		his-54, his-20	77.78	86.51	S36	HARKESYSVYIYRVL	20	26.67	Ser	13553	123	111.622	216.804	253.81	194.867	236.38	151.775
P62807 S37	HIST1H2BC	P62807	NP_003509.1	S37	RKRSRKESYSVYVYK	Ser	13906	126	P04255		his-15	80.95	88.1	S35	HARKESYSVYIYRVL	20	26.67	Ser	13482	122	111.622	216.804	253.81	194.867	236.38	151.775
P58876 S37	HIST1H2BD	P58876	NP_066407.1	S37	RKRSRKESYSVYVYK	Ser	13936	126	Q27894		his-54, his-20	80.16	87.3	S36	HARKESYSVYIYRVL	20	26.67	Ser	13553	123	111.622	216.804	253.81	194.867	236.38	151.775
O60814 S37	HIST1H2BK	O60814	NP_542160.1	S37	RKRSRKESYSVYVYK	Ser	13890	126	P04255		his-15	80.16	88.1	S35	HARKESYSVYIYRVL	20	26.67	Ser	13482	122	111.622	216.804	253.81	194.867	236.38	151.775
Q5QNW6 S37	HIST2H2BF	Q5QNW6	NP_001019770.1	S37	RKRSRKESYSVYVYK	Ser	13920	126	Q27484		his-41	80.16	87.3	S36	HARKESYSVYIYRVL	20	26.67	Ser	13527	123	111.622	216.804	253.81	194.867	236.38	151.775
P06576 S465	ATP5B	P06576	NP_001677.2	S465	RKIQRFLSQPFQVAE	Ser	56560	529	P46561		atp-2	79.18	84.94	S474	RKIQRFLSQPFQVAE	100	100	Ser	57508	538	110.743	198.702	183.218	175.111	184.794	148.627
Q15287 S251	RNPS1	Q15287	NP_006702.1	S251	RPPPRRFSPPRRMLP	Ser	34208	305	Q09511		rsp-4	21.97	32.46	S143	RSRSRTRSPPSRDRR	40	40	Ser	22569	196	109.828	263.806	239.303	247.637	239.865	280.843
Q16654 S308	PDK4	Q16654	NP_002603.1	S308	RIIDRLFSYTYSTAP	Ser	46469	411	Q02332		pdhk-2	47.69	65.94	Y300	RTILERLYNYMYSTA	13.33	20	Tyr	45263	401	109.8	209.913	188.239	183.295	193.009	165.938
Q13126 S123	MTAP	Q13126	NP_002442.2	S123	RTTMRPQSFYDGSHS	Ser	31236	283	Q09438		B0228.7	47.57	64.24	T115	RTTGRQSTFFDGSYD	53.33	73.33	Thr	31546	288	109.76	235.279	222.978	214.702	224.637	161.376
O94806 S213	PRKD3	O94806	NP_005804.1	S213	GVRKRRLSNVSLPGP	Ser	100471	890	O45818		dkf-2	45.14	57.85	S380	GSKQRRPSAIPLSPS	33.33	53.33	Ser	120565	1070	109.194	228.009	224.182	208.432	220.117	201.981
P53350 Y53	PLK1	P53350	NP_005021.2	Y53	DPRSRRRYVRGRFLG	Tyr	68255	603	P34331		plk-1	49.92	66.26	Y38	DKDRGTYYEKGRFLG	46.67	53.33	Tyr	73615	649	108.476	230.202	220.827	198.521	239.615	204.288
Q05513 Y126	PRKCZ	Q05513	NP_001028753.1	Y126	ARRWRKLYRANGHLF	Tyr	67660	592	Q19266		pkc-3	56.62	70.52	Y123	ARRWKKIYLYNGHRF	66.67	80	Tyr	68017	597	108.434	157.464	153.736	135.594	148.341	126.79
P12081 Y172	HARS	P12081	NP_002100.2	Y172	RGRYREFYQCDFDIA	Tyr	57411	509	P34183		hars-1	54.13	69.87	Y179	RGRYREFYQCDFDIA	100	100	Tyr	58541	521	108.048	152.194	143.125	140.185	145.432	118.962
Q16877 S214	PFKFB4	Q16877	NP_004558.1	S214	EDLDRDLSYIKIMDV	Ser	54040	469	Q21122		K02B2.1	47.12	65.03	S210	ESEDESLSFIKVINA	40	66.67	Ser	52072	457	107.986	334.267	283.381	297.217	291.779	264.213
Q16690 S216	DUSP5	Q16690	NP_004410.3	S216	LNVSRRTSEACATHL	Ser	42047	384	Q10038		vhp-1	20.24	33.03	S215	LSMTCPKSVCIKEDK	13.33	33.33	Ser	70984	657	107.548	238.523	276.766	225.893	258.487	195.794
P31321 S375	PRKAR1B	P31321	NP_002726.1	S375	RNIQRYNSFISLTV_	Ser	43073	381	P30625		kin-2	57.74	73.23	S360	RDVSNYNSYVKLMT_	35.71	64.29	Ser	41449	366	107.45	240.112	230.844	222.738	229.065	157.382
P84095 S71	RHOG	P84095	NP_001656.2	S71	YDRLRTLSYPQTNVF	Ser	21309	191	Q03206		ced-10	66.49	80.1	S71	YDRLRPLSYPQTDVF	86.67	93.33	Ser	21436	191	107.399	237.246	221.552	208.181	222.265	176.847
P33778 S37	HIST1H2BB	P33778	NP_066406.1	S37	RKRSRKESYSIYVYK	Ser	13950	126	Q27484		his-41	78.57	87.3	S36	HARKESYSVYIYRVL	26.67	26.67	Ser	13527	123	107.372	216.015	241.463	196.885	235.966	153.95
P06899 S37	HIST1H2BJ	P06899	NP_066402.2	S37	RKRSRKESYSIYVYK	Ser	13904	126	Q27894		his-54, his-20	78.57	87.3	S36	HARKESYSVYIYRVL	26.67	26.67	Ser	13553	123	107.372	216.015	241.463	196.885	235.966	153.95
P23527 S37	HIST1H2BO	P23527	NP_003518.2	S37	RKRSRKESYSIYVYK	Ser	13906	126	Q27894		his-54, his-20	79.37	87.3	S36	HARKESYSVYIYRVL	26.67	26.67	Ser	13553	123	107.372	216.015	241.463	196.885	235.966	153.95
Q16778 S37	HIST2H2BE	Q16778	NP_003519.1	S37	RKRSRKESYSIYVYK	Ser	13920	126	P04255		his-15	80.16	88.1	S35	HARKESYSVYIYRVL	26.67	26.67	Ser	13482	122	107.372	216.015	241.463	196.885	235.966	153.95
P78363 S1071	ABCA4	P78363	NP_000341.2	S1071	GGMQRKLSVAIAFVG	Ser	255944	2273	P34358		ced-7	23.8	42.15	Y645	SEHLKLVYGLKGARE	0	13.33	Tyr	191394	1704	106.365	196.818	196.266	179.912	181.96	140.349
P43354 Y317	NR4A2	P43354	NP_006177.1	Y317	RRRNRCQYCRFQKCL	Tyr	66591	598	P41829		nhr-6	27.14	42.33	Y322	RYRSRCQYCRYQKCL	80	93.33	Tyr	68604	619	105.708	180.006	158.891	149.685	178.637	184.257
Q494W8 Y142	CHRFAM7A	Q494W8	NP_647536.1	Y142	TMRRRTLYYGLNLLI	Tyr	46218	412	P48180		acr-16	36.14	47.99	Y231	HMRRRTLYYGFNLIM	73.33	86.67	Tyr	57150	498	105.644	175.567	154.766	147.219	158.417	135.27
P36544 Y232	CHRNA7	P36544	NP_000737.1	Y232	TMRRRTLYYGLNLLI	Tyr	56449	502	P48180		acr-16	45.22	61.35	Y231	HMRRRTLYYGFNLIM	73.33	86.67	Tyr	57150	498	105.644	175.567	154.766	147.219	158.417	135.27
P24723 S408	PRKCH	P24723	NP_006246.2	S408	MTEKRILSLARNHPF	Ser	77828	683	P34885		pkc-1	55.02	71.85	S431	MCEKRILSLAAKHPF	80	80	Ser	80133	707	104.931	208.517	209.2	189.866	193.588	166.331
O60231 Y234	DHX16	O60231	NP_003578.2	Y234	RKKSRREYLAKRERE	Tyr	119264	1041	O45244		mog-4	55.81	75.22	Y206	REESRRQYLKKRKVD	53.33	86.67	Tyr	114272	1008	104.917	173.665	209.207	160.516	193.926	152.397
O00160 Y1050	MYO1F	O00160	NP_036467.2	Y1050	GPRCRALYQYVGQDV	Tyr	124844	1098		NP_492393	hum-1	56.09	71.27	Y1053	NPVVIAVYPYEAQDV	46.67	53.33	Tyr	124867	1100	104.551	180.916	171.617	154.623	156.513	122.289
O75179 S1155	ANKRD17	O75179	NP_115593.3	S1155	RTKDTPLSLACSGGR	Ser	274258	2603	Q21920		R11A8.7	26.26	43.89	T1240	TTLETPLTIACANGH	46.67	73.33	Thr	287059	2620	103.915	53.2791	53.4735	39.3049	45.2384	49.8963
Q15139 S448	PRKD1	Q15139	NP_002733.2	S448	RHYWRLDSKCITLFQ	Ser	101704	912	O45818		dkf-2	43.74	56.26	T650	KHYWRLDTKGITMYQ	66.67	93.33	Thr	120565	1070	103.566	220.556	204.72	200.721	205.717	156.061
P17252 S241	PRKCA	P17252	NP_002728.1	S241	SDKDRRLSVEIWDWD	Ser	76764	672	P90980		pkc-2	66.42	79.77	S244	GDKDRRLSIEVWDWD	80	93.33	Ser	77982	682	103.282	225.218	203.287	203.607	208.897	177.993
P05771 S241	PRKCB	P05771	NP_002729.2	S241	SDKDRRLSVEIWDWD	Ser	76869	671	P90980		pkc-2	65.84	78.89	S244	GDKDRRLSIEVWDWD	80	93.33	Ser	77982	682	103.282	225.218	203.287	203.607	208.897	177.993
Q14D04 S153	VEPH1	Q14D04	NP_078897.1	S153	RNMSNYLSLAAITKA	Ser	94745	833	O17237		K10B4.3	27.44	47.65	S156	KNTTSYISLAAIHNG	46.67	73.33	Ser	97871	871	103.159	67.6968	109.821	54.5869	91.368	28.9136
A6NMB9 S619	FIGNL2	A6NMB9	NP_001013712.2	S619	PGLQRPLSYKDLEAA	Ser	66603	653	O16299		figl-1	23.12	39.66	T554	KDDIRAVTVMDFAEA	20	33.33	Thr	66169	594	102.775	306.384	273.977	276.966	268.323	257.936
Q02040 S687	SFRS17A	Q02040	NP_005079.2	S687	RSRSRSPSRHRSTWN	Ser	80735	695	P46504		F23F12.8	20	35.71	S973	DRLKSSNSDNITKKN	20	33.33	Ser	115327	980	102.771	223.982	264.278	220.791	255.588	217.162
O43822 S76	C21orf2	O43822	NP_004919.1	S76	LRRNRIPSLAELFYL	Ser	28340	256	P34390		F09G8.5	22.11	33.47	S176	LRKNCLESLDELEYL	60	73.33	Ser	55050	484	102.658	210.313	223.12	197.267	206.878	211.862
P84103 S140	SFRS3	P84103	NP_003008.1	S140	RRRERSLSRERNHKP	Ser	19330	164	Q18409		rsp-6	52.51	59.22	S124	RDRSRDRSRDRSRDR	40	53.33	Ser	20463	179	102.513	206.756	209.668	185.328	211.876	182.652
Q13126 S183	MTAP	Q13126	NP_002442.2	S183	RFSSRAESFMFRTWG	Ser	31236	283	Q09438		B0228.7	47.57	64.24	S175	RFSTKAESMVFKSWG	60	93.33	Ser	31546	288	101.879	272.8	289.833	241.35	278.934	167.407
Q12873 S1384	CHD3	Q12873	NP_001005271.2	S1384	RPEGRRQSKRQLRNE	Ser	226592	2000	Q22516		chd-3	47.3	61.8	S1255	ENMGQDWSAQNNQQQ	13.33	40	Ser	205237	1787	101.73	231.415	199.487	200.029	210.835	202.46
P07942 Y258	LAMB1	P07942	NP_002282.2	Y258	RMEIREKYYYAVYDM	Tyr	198066	1786	Q18823		lam-2	26.93	44.23	Y116	TMQEGQQYPTTTNLT	13.33	33.33	Tyr	170219	1535	101.465	140.871	122.866	132.872	127.922	120.023
Q14863 S240	POU6F1	Q14863	NP_002693.3	S240	KKRKRRTSFTPQAIE	Ser	32645	301	P20268		ceh-6	30	42.63	S287	RKRKKRTSIEVNVKS	40	53.33	Ser	42556	380	101.438	276.486	282.623	255.406	271.749	199.116
P46952 S247	HAAO	P46952	NP_036337.2	S247	TMGGRRLSLAPDDSL	Ser	32542	286	Q19341		haao-1	39.16	61.54	S245	TFAVVEESGFTYAMK	13.33	13.33	Ser	32209	281	101.36	229.43	232.125	206.71	222.311	178.558
Q14D04 T742	VEPH1	Q14D04	NP_078897.1	T742	RWKTRYFTLAGNQLL	Thr	94745	833	O17237		K10B4.3	27.44	47.65	T783	RWNTKYFTLSSAALN	53.33	66.67	Thr	97871	871	101.304	144.207	140.28	133.533	131.573	110.968
O00634 S366	NTN3	O00634	NP_006172.1	S366	RDPGRALSDRRACRA	Ser	61466	580	P34710		unc-6	44.28	59.31	T402	RDTSLPMTHRKACKS	33.33	66.67	Thr	68423	612	100.969	206.232	183.414	165.924	189.313	189.748
O43752 S152	STX6	O43752	NP_005810.1	S152	RELQRANSHFIEEQQ	Ser	29176	255	P83528		syx-6	23.92	36.86	T50	LVGNSVRTLRGMSSM	0	6.67	Thr	14016	122	100.964	305.171	282.072	276.142	272.688	231.909
O95398 S53	RAPGEF3	O95398	NP_001092001.1	S53	RRMHRPRSCSYQLLL	Ser	103652	923	P34578		epac-1	27.23	42.22	S181	HFLFRITSNLFVFIL	20	40	Ser	141798	1234	100.964	202.507	187.605	175.244	193.083	175.399
P29074 S689	PTPN4	P29074	NP_002821.1	S689	KNRYRDISPYDATRV	Ser	105911	926	P28191		ptp-1	41.13	59.06	Y789	RYRDVCPYDDTRVTL	6.67	20	Tyr	115075	1026	100.697	255.263	244.223	235.058	244.959	245.445
P39023 S350	RPL3	P39023	NP_000958.1	S350	RVLTLRKSLLVQTKR	Ser	46109	403	P50880		rpl-3	71.46	85.86	S347	RLITLRKSLITQTKR	73.33	93.33	Ser	45641	401	100.378	155.683	148.143	149.966	140.648	121.895
Q15119 S305	PDK2	Q15119	NP_002602.2	S305	RKIERLFSYMYSTAP	Ser	46154	407	Q02332		pdhk-2	48.89	66.34	Y300	RTILERLYNYMYSTA	13.33	20	Tyr	45263	401	100.341	201.488	189.504	176.781	190.205	168.114
O94906 S830	PRPF6	O94906	NP_036601.2	S830	RPQRRTKSVDALKKC	Ser	106925	941		NP_507525	prp-6	55.17	71.69	S857	PHGRRAKSIDALKKC	66.67	73.33	Ser	109143	968	100.261	232.661	216.98	199.178	207.272	196.225
P62995 S95	TRA2B	P62995	NP_004584.1	S95	RDYRRRHSHSHSPMS	Ser	33666	288	Q09511		rsp-4	23.96	34.38	T31	DNLSYQTTPNDLRRT	0	33.33	Thr	22569	196	100.236	211.039	199.745	198.035	203.817	220.11
P35626 Y109	ADRBK2	P35626	NP_005151.2	Y109	LCRSRQIYDAYIMKE	Tyr	79710	688	Q09639		grk-2	64.64	78.5	Y109	LTKAREIYDHHIMVE	53.33	80	Tyr	80960	707	99.9238	194.237	231.02	179.142	214.071	151.234
O60783 S107	MRPS14	O60783	NP_071383.1	S107	VKRRWRLSRIVFRHL	Ser	15139	128	P49391		mrps-14	28.14	42.21	S178	KIKPYRLSRHLFRRF	40	60	Ser	23396	199	99.6947	83.9037	98.5442	71.5897	87.2352	76.1226
P51805 S1410	PLXNA3	P51805	NP_059984.2	S1410	LLLRRTESVAEKMLT	Ser	207703	1871	O45657		plx-2	26.4	45.38	S1307	LLFRNSDSVVEKMFS	53.33	73.33	Ser	195762	1766	99.4188	311.469	283.541	286.165	274.977	259.436
P43250 S154	GRK6	P43250	NP_001004105.1	S154	RLTHEYLSVAPFADY	Ser	65991	576	Q09537		grk-1	53.89	66.98	T171	RLTCQYLTDAPFKEF	53.33	80	Thr	73759	642	99.25	37.241	58.5236	25.9755	34.3471	7.77157
P51991 S116	HNRNPA3	P51991	NP_919223.1	S116	RAVSREDSVKPGAHL	Ser	39595	378	Q22037		hrp-1	43.92	58.2	T92	PHIIDGKTVDPKRAV	13.33	33.33	Thr	36325	346	99.1408	212.289	240.764	198.806	224.51	171.681
Q13461 T93	FOXE3	Q13461	NP_036318.1	T93	HAPGRRLTLAAIYRF	Thr	33234	319		NP_496411	unc-130	36.04	49.25	T149	NSPEKKLTLSEICEF	40	73.33	Thr	37274	333	99.0993	167.955	166.47	158.017	155.876	142.843
Q16280 S40	CNGA2	Q16280	NP_005131.1	S40	RTSSRPHSAADDDTS	Ser	76048	664	Q03611		tax-4	39.29	55.8	S71	KYMPNGNSNAVQPAA	13.33	33.33	Ser	83874	733	98.891	191.633	228.027	173.449	209.984	145.76
Q15771 S77	RAB30	Q15771	NP_055303.2	S77	RFRSITQSYYRSANA	Ser	23058	203		NP_499328	rab-30	54.63	73.15	S75	RFRSITQSYYRSAHA	93.33	100	Ser	24348	216	98.7199	115.335	141.552	91.7499	134.97	88.4559
Q02338 S11	BDH1	Q02338	NP_004042.1	S11	TRLSRPLSRLPGKTL	Ser	38157	343		NP_505941	dhs-20	37.03	53.64	T11	CCLCTLFTWVLYFVA	6.67	20	Thr	38710	342	98.4779	336.471	347.89	298.782	334.499	278.962
P27708 S1406	CAD	P27708	NP_004332.2	S1406	GAGGRRLSSFVTKGY	Ser	242984	2225		NP_495838	pyr-1	57.89	73.3	S1418	GSGAYRVSAFRTHGY	53.33	73.33	Ser	242563	2198	98.3705	211.666	214.04	190.864	200.109	160.648
P43686 S117	PSMC4	P43686	NP_006494.1	S117	NYYVRILSTIDRELL	Ser	47366	418	P46502		rpt-3	76.79	85.41	S113	NYYVRVLSILDRELL	80	93.33	Ser	46340	414	98.3359	199.913	180.69	173.842	181.87	158.663
P08621 S293	SNRNP70	P08621	NP_003080.2	S293	RDRKRRSSRSRERAR	Ser	51557	437	Q10021		rsp-5	24.49	32.72	S117	DRKRSRRSRSRSSSR	40	60	Ser	23961	208	98.019	195.57	196.246	176.082	193.858	163.575
O15067 T1152	PFAS	O15067	NP_036525	T1152	RFRKRPDTFSLGVCN	Thr	144724	1338	Q19311		F10F2.2	47.51	64.11	T1159	AFRSRPDTFSYGVCN	80	80	Thr	148611	1343	97.867	222.609	198.289	196.56	202.219	139.757
P51805 S1596	PLXNA3	P51805	NP_059984.2	S1596	FTFTRSLSRYESLLR	Ser	207703	1871	O45657		plx-2	26.4	45.38	S1489	YRNSLADSGQSSWSS	13.33	33.33	Ser	195762	1766	97.6999	191.963	181.106	175.713	183.011	177.947
P26368 Y152	U2AF2	P26368	NP_001012496.1	Y152	TRQARRLYVGNIPFG	Tyr	53501	475	P90978		uaf-1	51.41	62.5	Y187	TCQSRRLYVGNIPFG	86.67	93.33	Tyr	55412	496	97.5427	168.42	150.884	152.256	162.718	170.051
Q15283 S400	RASA2	Q15283	NP_006497.2	S400	NTIFRGNSLATRCLD	Ser	96527	849	Q22720		gap-1	22.97	38.63	S196	LSSLYVNSILKCQDE	13.33	33.33	Ser	71298	629	97.3904	199.144	197.361	184.221	185.051	149.845
P13942 S143	COL11A2	P13942	NP_542410.2	S143	QPVFRGLSLADGKWH	Ser	171775	1736	P17139		emb-9	32.97	40.82	S212	LPGFPGVSGLKGRMG	33.33	46.67	Ser	171068	1759	97.2389	219.475	209.283	192.234	194.171	150.404
O75891 S117	ALDH1L1	O75891	NP_036322.2	S117	LPRHRGASAINWTLI	Ser	98829	902		NP_502054	alh-3	59.25	74.89	S123	LPKHRGASAINWTLI	93.33	100	Ser	99259	908	97.1238	231.209	200.474	197.442	203.139	149.82
Q13595 S274	TRA2A	Q13595	NP_037425.1	S274	RYRSRSRSRSYSPRR	Ser	32689	282	Q09511		rsp-4	21.99	31.21	S189	RSASRSPSRSRSNSR	60	60	Ser	22569	196	97.0771	218.54	250.381	207.003	247.308	194.546
Q03701 Y761	CEBPZ	Q03701	NP_005751.2	Y761	RFLDRFVYRNPKPHK	Tyr	120988	1054	Q19753		F23B12.7	30.83	50.09	Y677	MEGREINYGGEALND	6.67	13.33	Tyr	108405	953	97.06	291.339	237.049	256.017	241.225	237.503
Q15825 S412	CHRNA6	Q15825	NP_004189.1	S412	ATSKRRLSHQPLQWV	Ser	56898	494	Q9N587		unc-63	46.02	64.34	S424	NSNREESSFTLPRDN	6.67	33.33	Ser	57373	502	96.7368	218.573	227.144	195.281	208.372	183.651
O14617 S220	AP3D1	O14617	NP_001070991.1	S220	RNPKNYLSLAPLFFK	Ser	130158	1153		NP_494570	apd-3	47.16	66.67	T220	KNPKNYLTLAPVFFK	80	100	Thr	139932	1251	96.673	46.0465	73.2385	32.6083	40.3952	18.7642
Q14807 S516	KIF22	Q14807	NP_015556.1	S516	PTMLRPLSHRTVTGA	Ser	73262	665	P46873		osm-3	28.18	45.78	T558	QPIIKKDTNYSNVDR	0	40	Thr	78760	699	96.4147	222.562	185.881	173.639	203.218	200.427
P83881 S46	RPL36A	P83881	NP_066357.1	S46	RRYDRKQSGYGGQTK	Ser	12441	106	P48166		rpl-41	79.25	86.79	S47	RRYDRKQSGFGGQTK	93.33	100	Ser	12348	105	96.3872	203.368	178.148	177.635	191.172	150.577
Q13946 S437	PDE7A	Q13946	NP_002594.1	S437	RFSNTRLSQTMLGHV	Ser	55505	482	Q22000		pde-4	24.04	41.54	Y628	DYIVHPLYETWADLV	20	33.33	Tyr	75370	674	96.321	73.4895	72.4002	56.0371	65.2445	44.819
O75533 S400	SF3B1	O75533	NP_036565.2	S400	DERNRPLSDEELDAM	Ser	145830	1304		NP_497853	T08A11.2	65.13	76.7	T407	DDRNRPLTDEELDSL	73.33	100	Thr	147305	1322	96.2849	211.037	211.493	183.905	199.18	188.871
O75489 T189	NDUFS3	O75489	NP_004542.1	T189	PDLRRILTDYGFEGH	Thr	30242	264		NP_491881	nuo-2	36.63	48.54	T363	PDLRRILTDYGFEGH	100	100	Thr	51199	445	96.2392	264.322	218.976	234.97	227.339	220.5
O95069 S385	KCNK2	O95069	NP_001017424.1	S385	TPCRRTLSVNHLTSE	Ser	47093	426	O17185		sup-9	26.06	41.78	Y296	SLASCSCYQLPDEKL	0	13.33	Tyr	36973	329	95.7364	256.5	221.341	206.749	227.901	171.206
P49760 S50	CLK2	P49760	NP_003984.2	S50	RRRRREDSYHVRSRS	Ser	60090	499	Q9XTF3		mbk-2	20.44	34.52	T348	ASHSTLNTASTHDMM	0	13.33	Thr	89866	817	95.723	204.049	203.376	180.096	196.899	172.802
Q13247 S204	SFRS6	Q13247	NP_006266.2	S204	RSRSRRRSRSRSRRS	Ser	39587	344	Q23120		rsp-2	45.93	59.01	S142	LGIEPTYSEAHKRNV	13.33	20	Ser	32403	281	95.5172	213.238	247.256	200.74	238.803	200.589
Q13319 S305	CDK5R2	Q13319	NP_003927.1	S305	LRLIQRLSPQMLRLN	Ser	38705	367	Q22695		cdka-1	31.61	42.51	Y294	LSCLYVSYSYMGNEI	13.33	20	Tyr	39856	356	95.3641	210.333	194.904	193.794	193.617	237.213
Q14152 T805	EIF3A	Q14152	NP_003741.1	T805	RKEERRITYYREKEE	Thr	166569	1382	P34339		egl-45	31.48	48.34	S730	AVMNMRLSEAPKLHD	6.67	33.33	Ser	124390	1076	94.9452	172.018	178.785	151.68	166.269	163.79
P13056 S581	NR2C1	P13056	NP_001027458.1	S581	IGNIRIDSVIPHILK	Ser	67315	603	Q9N4B8		nhr-41	22.93	42.11	T574	IGPMSIETIIPFVLQ	40	80	Thr	68010	615	94.9262	213.035	230.973	196.219	195.665	156.242
Q08493 S62	PDE4C	Q08493	NP_000914.2	S62	GCRERDLSPRPELRK	Ser	79902	712	Q22000		pde-4	46.35	61.52	S49	SPSASSTSRTPPAAL	13.33	13.33	Ser	75370	674	94.8323	274.123	254.646	226.146	259.724	295.115
P15291 S344	B4GALT1	P15291	NP_001488.2	S344	RCRMIRHSRDKKNEP	Ser	43920	398	Q9GUM2		bre-4	36.43	55.53	S316	RYKMIKHSTEATNPV	40	60	Ser	43895	383	94.5452	87.4199	100.408	73.346	94.1423	96.1008
Q3L8U1 S2636	CHD9	Q3L8U1	NP_079410.4	S2636	RRGRRPKSGIAKATA	Ser	326022	2897	Q22516		chd-3	22.3	36.24	Y1530	LLAAVAVYGYGRYQI	6.67	13.33	Tyr	205237	1787	94.5335	199.836	185.134	176.314	193.641	187.892
P53350 S137	PLK1	P53350	NP_005021.2	S137	LELCRRRSLLELHKR	Ser	68255	603	P34331		plk-1	49.92	66.26	S123	LELCARRSLMELHKR	86.67	93.33	Ser	73615	649	94.4056	314.2	295.637	299.553	287.308	276.129
Q13243 S267	SFRS5	Q13243	NP_001034554.1	S267	RSRSRSRSVDSGN__	Ser	31264	272	Q23121		rsp-1	50.32	65.06	S301	GSPRRSRSASPMDNG	33.33	46.67	Ser	35023	312	93.9509	221.449	250.788	210.226	251.169	175.136
P06213 S77	INSR	P06213	NP_000199.2	S77	PEDFRDLSFPKLIMI	Ser	156319	1382	Q968Y9		daf-2	28.28	42.36	T219	YSQDEFITFPHLREI	26.67	40	Thr	207106	1846	93.9399	260.122	247.254	227.843	234.939	178.292
Q08493 T246	PDE4C	Q08493	NP_000914.2	T246	RILNRELTHLSETSR	Thr	79902	712	Q22000		pde-4	46.35	61.52	T227	WCLDQLETIQTHRSV	20	40	Thr	75370	674	93.8999	249.759	198.785	217.201	222.54	172.001
P53350 S519	PLK1	P53350	NP_005021.2	S519	RTWFRTRSAIILHLS	Ser	68255	603	P34331		plk-1	49.92	66.26	S524	RVWFRTKSAIVLHLS	80	93.33	Ser	73615	649	93.8686	203.915	194.349	179.554	186.616	146.498
P26639 S426	TARS	P26639	NP_689508.3	S426	MFDHRPRSWRELPLR	Ser	83435	723	P52709		tars-1	60.14	75.72	T425	MFGHMPHTYNELPFR	53.33	66.67	Thr	84399	725	93.7509	244.58	202.307	193.452	216.774	239.118
O43314 S554	HISPPD1	O43314	NP_056031.2	S554	CGLLRLHSTYRHDLK	Ser	140407	1243	P91309		F46F11.1	43.76	60.39	S563	LGFLRLHSTYRHDLK	86.67	86.67	Ser	150102	1323	93.7165	305.913	275.286	283.646	275.022	241.213
Q16875 S461	PFKFB3	Q16875	NP_001138915.1	S461	NPLMRRNSVTPLASP	Ser	59609	520	Q21122		K02B2.1	47.12	62.88	Y399	VLRCVLAYFYDRPLS	0	0	Tyr	52072	457	93.6684	351.258	319.271	323.888	317.898	264.584
P32298 T349	GRK4	P32298	NP_001004056.1	T349	RVRGRVGTVGYMAPE	Thr	66583	578	Q09537		grk-1	50.78	66.04	T365	PIKGRVGTVGYMAPE	80	93.33	Thr	73759	642	93.1102	143.281	135.46	128.625	136.765	101.839
O75808 S456	SOLH	O75808	NP_005623.1	S456	APLRRRESMHVEQRR	Ser	117314	1086		NP_741604	T11A5.6	25.41	38.31	S124	KKSDVIYSNIISYCK	6.67	20	Ser	80894	718	93.073	340.425	308.497	309.527	303.054	264.555
Q00535 S159	CDK5	Q00535	NP_004926.1	S159	GIPVRCYSAEVVTLW	Ser	33304	292		NP_499783	cdk-5	73.63	86.99	S159	GVPVRCFSAEVVTLW	86.67	100	Ser	33044	292	92.9965	198.705	193.188	176.39	182.254	135.469
Q14997 S91	PSME4	Q14997	NP_055429.2	S91	RLYGRKFSKEDHVLF	Ser	211334	1843		NP_506153	C14C10.5	29.87	48.32	S136	DYYGRRFSKEEHIQL	53.33	73.33	Ser	219794	1908	92.9909	181.995	166.654	163.466	167.944	121.552
O60928 S287	KCNJ13	O60928	NP_002233.2	S287	EICQRRTSYLPSEIM	Ser	40530	360	P52192		irk-1	27.33	43.96	S346	MTAQAKTSYLPSEVL	53.33	73.33	Ser	57401	505	92.9794	222.396	224.817	208.14	214.309	222.268
P05997 S192	COL5A2	P05997	NP_000384.2	S192	DGLSRPFSAQMAGLD	Ser	144910	1499	P17139		emb-9	35.08	43.89	S166	PGEGGVNSQGRKGVK	20	26.67	Ser	171068	1759	92.9526	329.2	328.82	304.005	323.667	251.896
Q16478 S568	GRIK5	Q16478	NP_002079.3	S568	LFLAARLSPYEWYNP	Ser	109265	980	P34299		glr-1	30.51	48.27	S616	IFLVSRFSPYEWRVE	53.33	66.67	Ser	108124	962	92.9288	229.235	192.009	204.004	199.461	239.192
Q15050 T112	RRS1	Q15050	NP_055984.1	T112	LPRPRPLTRWQQFAR	Thr	41193	365	Q9XVT0		rrbs-1	39.18	55.89	Y120	TKEWKPTYGYRRGND	6.67	33.33	Tyr	37967	333	92.895	177.652	150.621	151.507	154.375	131.044
O43678 S59	NDUFA2	O43678	NP_002479.1	S59	PILIRECSDVQPKLW	Ser	10922	99		NP_493465	Y63D3A.7	44.44	58.59	S53	PILIREASGIVPRVF	53.33	80	Ser	10186	92	92.674	311.268	278.892	284.832	273.682	247.332
Q14644 S735	RASA3	Q14644	NP_031394.2	S735	RETERIYSLFNLYMS	Ser	95699	834	Q22720		gap-1	21.7	40.29	T534	RHVDKIHTLLYKYRE	26.67	53.33	Thr	71298	629	92.6638	192.111	194.045	173.053	181.501	152.594
O75643 S1786	SNRNP200	O75643	NP_054733.2	S1786	RHLSDHLSELVEQTL	Ser	244508	2136	Q9U2G0		snrp-200	60.84	79.25	S1785	RHLSDALSELVELTL	86.67	86.67	Ser	243812	2145	92.6472	183.963	202.965	164.432	189.102	139.018
Q5JWR5 S212	DOPEY1	Q5JWR5	NP_055833.2	S212	AHLNRKLSMEDQLYI	Ser	277355	2465	Q9XW10		pad-1	22.07	39.84	S217	AKFDKLKSLDDQIHL	26.67	73.33	Ser	267134	2417	92.5282	304.709	266.27	278.143	270.929	231.873
O75431 S147	MTX2	O75431	NP_006545.1	S147	ITHARYGSPYPWPLN	Ser	29763	263	P34599		mtx-2	32.7	52.09	S120	ADMRANISMIEHLLT	13.33	13.33	Ser	26066	230	92.3007	248.699	241.872	227.571	234.091	265.592
Q14562 S208	DHX8	Q14562	NP_004932.1	S208	RHRSRSRSRSRTRER	Ser	139315	1220	Q09530		mog-5	61.39	75.49	S184	DRRRRSRSREDRRDR	53.33	60	Ser	135741	1200	91.9525	219.495	266.515	202.709	250.975	173.725
P31040 S514	SDHA	P31040	NP_004159.2	S514	RTSELRLSMQKSMQN	Ser	72692	664	Q09508		sdha-1	70.18	80.57	T496	STAELRLTMQKSMQN	80	93.33	Thr	70380	646	91.6476	64.3541	63.8422	49.6095	65.7039	71.4118
Q13510 S301	ASAH1	Q13510	NP_001120977.1	S301	ITRDRKESLDVYELD	Ser	44660	395	O45686		asah-1	38.73	62.03	T299	IARSLDKTALLTEMA	20	46.67	Thr	44805	393	91.6385	219.858	210.576	187.856	203.226	175.942
P36959 T332	GMPR	P36959	NP_006868.3	T332	KELSRRATFIRVTQQ	Thr	37419	345	O16294		F32D1.5	67.32	82.4	T333	KELAKRATFIRVTQQ	86.67	100	Thr	38788	358	91.5896	348.867	355.714	327.582	347.149	275.959
P54198 S758	HIRA	P54198	NP_003316.3	S758	ACEKRMLSVFSTCGR	Ser	111835	1017	Q09589		K10D2.1	26.55	46.12	S694	FCGTHIVSLRLDSLP	13.33	33.33	Ser	103412	935	91.337	201.508	177.718	179.687	184.876	133.722
O75817 S128	POP7	O75817	NP_005828.2	S128	LTRIRNNSAIHIRVF	Ser	15651	140		NP_502572	Y62E10A.2	30.71	55	S119	ETRHRSVSAVHVHLY	40	73.33	Ser	14707	130	91.3126	210.752	202.37	193.493	202.69	156.414
Q13613 S346	MTMR1	Q13613	NP_003819.1	S346	IFDARQNSVADTNKT	Ser	74678	665	Q22712		mtm-3	22.47	36.38	T372	IMDARGYTSAFANRA	40	53.33	Thr	113596	1006	91.3057	224.805	210.251	198.544	199.865	148.026
O95475 Y147	SIX6	O95475	NP_031400.2	Y147	RHLLREWYLQDPYPN	Tyr	27687	246	Q23175		ceh-32	35.08	42.14	Y204	RSLLREWYLKDPYPN	86.67	93.33	Tyr	49618	439	91.2304	236.397	199.406	224.456	207.04	188.431
O75643 S1782	SNRNP200	O75643	NP_054733.2	S1782	GISHRHLSDHLSELV	Ser	244508	2136	Q9U2G0		snrp-200	60.84	79.25	S1781	GTTHRHLSDALSELV	80	86.67	Ser	243812	2145	91.1995	190.258	172.633	164.948	174.282	161.084
Q5T280 S76	C9orf114	Q5T280	NP_057474.2	S76	RGRPYTLSVALPGSI	Ser	42009	376	Q10950		B0361.6	37.57	55.82	S69	HTPPFTISIAVPGQF	40	66.67	Ser	43008	378	91.0149	65.1304	65.9257	46.7628	63.9967	7.84236
P13533 S1364	MYH6	P13533	NP_002462.2	S1364	AELQRVLSKANSEVA	Ser	223734	1939	P02566		unc-54	49.69	71.11	S1374	NEILRQLSKANADIQ	46.67	73.33	Ser	225108	1966	90.9453	296.603	277.297	271.79	262.873	248.99
P12883 S1362	MYH7	P12883	NP_000248.2	S1362	AELQRVLSKANSEVA	Ser	223097	1935	P02566		unc-54	49.39	70.6	S1374	NEILRQLSKANADIQ	46.67	73.33	Ser	225108	1966	90.9453	296.603	277.297	271.79	262.873	248.99
O43896 Y726	KIF1C	O43896	NP_006603.2	Y726	RRAPRRVYQIPQRRR	Tyr	122947	1103	P23678		unc-104	30.37	43.56	T698	KWRYHQFTSVRDDLW	0	20	Thr	179603	1584	90.9414	151.734	149.121	140.876	146.665	138.765
O60928 S169	KCNJ13	O60928	NP_002233.2	S169	RPKNRAFSIRFTDTA	Ser	40530	360	P52192		unc-104	27.33	43.96	T223	RPKKRAETIIFSDKA	60	73.33	Thr	57401	505	90.8739	222.867	188.15	182.891	199.739	176.511
P55039 Y243	DRG2	P55039	NP_001379.1	Y243	RVYMPCLYVYNKIDQ	Tyr	40746	364	P34280		C02F5.3	75.14	86.07	Y243	RVYMTCLYVYNKVDQ	86.67	93.33	Tyr	40804	366	90.7042	-4.63652	-9.0498	-9.20328	-5.57859	-11.0312
P62988 S57	RPS27A	P62988	NP_001029102.1	S57	LEDGRTLSDYNIQKE	Ser	8565	76	P14792		ubl-1	98.68	98.68	S57	LEDGRTLSDYNIQKE	100	100	Ser	8520	76	90.3606	213.606	196.413	183.057	192.517	155.689
Q15349 S377	RPS6KA2	Q15349	NP_001006933.1	S377	HHLFRGFSFVASSLI	Ser	83239	733	Q21734		rskn-1	56.76	71.56	S422	HEIFRGFSFVSNAVM	53.33	93.33	Ser	88102	784	90.2723	354.036	320.201	330.599	320.588	265.469
P56524 S632	HDAC4	P56524	NP_006028.2	S632	RPLSRAQSSPASATF	Ser	119040	1084	O17323		hda-4	32.29	46.49	T406	FLAKQEPTCTTGLGY	0	20	Thr	88964	816	90.2025	325.86	317.15	297.683	309.58	251.95
O15379 T308	HDAC3	O15379	NP_003874.2	T308	RNVARCWTYETSLLV	Thr	48848	428	O17695		hda-1	52.49	70.72	T317	RNVARCWTYETSIAV	86.67	93.33	Thr	52119	461	90.1045	133.345	118.799	121.546	121.113	119.408
Q15831 S428	STK11	Q15831	NP_000446.1	S428	SSKIRRLSACKQQ__	Ser	48636	433	Q9GN62		par-4	29.82	43.76	T572	AGNAQNSTAENGAET	6.67	26.67	Thr	69630	617	89.8968	223.053	209.785	196.545	211.419	174.093
P26367 S279	PAX6	P26367	NP_000271.1	S279	RNQRRQASNTPSHIP	Ser	46683	422		NP_001024570	vab-3	50.11	62.42	S292	GTMDSSLSNGTPTPT	13.33	13.33	Ser	51043	455	89.7686	214.417	206.702	188.327	196.432	184.105
Q15418 S87	RPS6KA1	Q15418	NP_001006666.1	S87	RKVTRPDSGHLYAMK	Ser	82723	735	Q21734		rskn-1	58.29	73.09	S129	RKVRGRDSGHVYAMK	73.33	80	Ser	88102	784	89.7165	200.639	184.488	185.084	186.102	153.772
A6NDJ8 S55	NULL	A6NDJ8	NP_940892	S55	RFRTITQSYYRSANG	Ser	20210	181		NP_502576	rab-19	46.67	59.05	S78	RFRTITQSYYRSANG	100	100	Ser	23303	210	89.6455	89.3193	81.9802	68.2616	81.4894	70.034
O95947 S178	TBX6	O95947	NP_004599.2	S178	RVYIHPDSPATGAHW	Ser	47045	436	Q19691		tbx-2	35.55	52.52	Y186	ILNSMHKYQPRLHVV	0	6.67	Tyr	46979	423	89.6225	92.8355	102.392	91.6534	89.9672	131.882
P84103 S160	SFRS3	P84103	NP_003008.1	S160	RSRSRSRSNERK___	Ser	19330	164	Q18409		rsp-6	52.51	59.22	S148	RERERTRSRSRSPQE	40	46.67	Ser	20463	179	89.5521	228.529	268.973	222.272	260.223	192.876
P52954 S128	LBX1	P52954	NP_006553.2	S128	TPKKRRKSRTAFTNH	Ser	30221	281	Q22910		ceh-31	26.69	39.86	Y118	NTFEKQKYLSVQDRM	6.67	33.33	Tyr	28777	260	89.4723	232.049	209.033	209.216	213.437	181.806
P11055 S1363	MYH3	P11055	NP_002461.2	S1363	AELQRALSKANSEVA	Ser	223905	1940	P02566		unc-54	48.52	70.09	S1374	NEILRQLSKANADIQ	46.67	73.33	Ser	225108	1966	89.4353	299.647	286.718	272.711	263.581	249.704
P13535 S1365	MYH8	P13535	NP_002463.2	S1365	AELQRALSKANSEVA	Ser	222763	1937	P02566		unc-54	49.39	70.04	S1374	NEILRQLSKANADIQ	46.67	73.33	Ser	225108	1966	89.4353	299.647	286.718	272.711	263.581	249.704
O95476 T89	DULLARD	O95476	NP_001137247.1	T89	RPTVRPGTPPDFILK	Thr	28377	244	Q20432		scpl-2	65.45	78.86	T85	RQTVKPGTPSDFTIR	60	80	Thr	28395	246	89.4159	190.587	163.253	170.714	167.947	205.538
O95140 S483	MFN2	O95140	NP_001121132.1	S483	RNMSDRCSTAITNSL	Ser	86402	757	Q23424		fzo-1	34.88	55.68	T493	SDLEARCTGGLMSRI	13.33	53.33	Thr	87443	774	89.3867	108.296	150.972	109.386	144.518	95.3471
P54840 S563	GYS2	P54840	NP_068776.2	S563	RFRSPDDSCNQLTKF	Ser	80989	703	Q9U2D9		gsy-1	50.92	67.14	S528	CHLGVFPSYYEPWGY	6.67	20	Ser	76441	672	89.3208	111.135	134.932	87.0384	122.464	46.8168
O75165 S634	DNAJC13	O75165	NP_056083.3	S634	MLTNRQLSRHLVGLW	Ser	254431	2243		NP_001021395	rme-8	45.31	64.55	S640	VMTNKQLSGHLISLW	60	86.67	Ser	258320	2271	89.2627	206.675	187.603	179.241	189.144	147.609
Q13753 T344	LAMC2	Q13753	NP_005553.2	T344	RRLLRNLTALRIRAT	Thr	130976	1193	Q18823		lam-2	22.8	38.7	T645	IGILSNITAIKIRGT	46.67	73.33	Thr	170219	1535	89.2244	239.945	207.719	216.777	214.806	208.701
A7E2Y1 S1686	MYH7B	A7E2Y1	NP_065935.2	S1686	QALERRASLLAAELE	Ser	221389	1941	P02566		unc-54	48.07	69.68	T1691	FNAEKRATLLQSEKE	46.67	66.67	Thr	225108	1966	89.0401	329.356	287.471	297.26	292.812	262.628
Q15669 S72	RHOH	Q15669	NP_004301.1	S72	FRSIRPLSYQQADVV	Ser	21331	191	Q03206		ced-10	42.41	65.45	Y72	DRLRPLSYPQTDVFL	13.33	20	Tyr	21436	191	88.9935	204.069	189.585	174.414	196.073	169.954
Q14240 T390	EIF4A2	Q14240	NP_001958.2	T390	RILRDIETFYNTTVE	Thr	46402	407	P27639		inf-1	69.29	83.05	S385	RQLKEIESYYTTQIE	46.67	80	Ser	45389	402	88.8896	149.284	127.692	147.736	133.11	110.67
A8MZA4 T134	NULL	A8MZA4	NP_001001413	T134	VHTIRILTCQKTELQ	Thr	77045	620	P46504		F23F12.8	20.61	37.96	S309	VQHQKTVSERQQQEK	6.67	53.33	Ser	115327	980	88.8029	161.508	142.049	131.978	144.563	119.705
P84243 T46	H3F3A	P84243	NP_002098.1	T46	PHRYRPGTVALREIR	Thr	15328	136	Q10453		his-71	99.26	100	T46	PHRYRPGTVALREIR	100	100	Thr	15323	136	88.645	158.008	159.664	142.604	147.989	140.873
P68431 T46	HIST1H3A	P68431	NP_003520.1	T46	PHRYRPGTVALREIR	Thr	15404	136	P08898		his-17	97.79	99.26	T46	PHRYRPGTVALREIR	100	100	Thr	15357	136	88.645	158.008	159.664	142.604	147.989	140.873
Q16695 T46	HIST3H3	Q16695	NP_003484.1	T46	PHRYRPGTVALREIR	Thr	15508	136	P08898		his-17	94.85	97.79	T46	PHRYRPGTVALREIR	100	100	Thr	15357	136	88.645	158.008	159.664	142.604	147.989	140.873
P11229 S132	CHRM1	P11229	NP_000729.2	S132	FSVTRPLSYRAKRTP	Ser	51421	460	Q9U7D5		gar-3	34.7	46.97	S172	FSVTRPLSYRPRRTT	80	86.67	Ser	69544	611	88.5941	205.869	172.907	166.362	191.101	194.351
Q15418 S154	RPS6KA1	Q15418	NP_001006666.1	S154	GDLFTRLSKEVMFTE	Ser	82723	735	Q21734		rskn-1	58.29	73.09	S196	GDLFTRLSKEVMFTE	100	100	Ser	88102	784	88.4947	173.454	162.222	162.192	154.866	131.925
Q15349 S151	RPS6KA2	Q15349	NP_001006933.1	S151	GDLFTRLSKEVMFTE	Ser	83239	733	Q21734		rskn-1	56.76	71.56	S196	GDLFTRLSKEVMFTE	100	100	Ser	88102	784	88.4947	173.454	162.222	162.192	154.866	131.925
P51812 S160	RPS6KA3	P51812	NP_004577.1	S160	GDLFTRLSKEVMFTE	Ser	83736	740	Q21734		rskn-1	57.65	71.56	S196	GDLFTRLSKEVMFTE	100	100	Ser	88102	784	88.4947	173.454	162.222	162.192	154.866	131.925
O75558 S219	STX11	O75558	NP_003755.2	S219	RELLRLESRIRDVHE	Ser	33196	287	O16000		unc-64	30.24	53.61	S208	NDIMKLESSIRELHD	40	86.67	Ser	33234	291	88.4791	288.74	264.794	265.98	261.073	233.139
P46019 S7	PHKA2	P46019	NP_000283.1	S7	_MRSRSNSGVRLDGY	Ser	138408	1235	P34335		C14B9.8	40.49	58.95	S7	_MRSRSGSGVRLDRI	78.57	78.57	Ser	139432	1226	88.4571	240.426	293.793	231.173	271.626	199.882
A7E2Y1 S1369	MYH7B	A7E2Y1	NP_065935.2	S1369	AELQRLLSKANAEVA	Ser	221389	1941	P02566		unc-54	48.07	69.68	S1374	NEILRQLSKANADIQ	53.33	73.33	Ser	225108	1966	88.4211	298.406	279.153	269.846	264.715	222.954
P52198 S194	RND2	P52198	NP_005431.1	S194	RQLRRTDSRRGMQRS	Ser	25369	227	Q22038		rho-1	40.09	62.11	T163	YLECSAKTKDGIREV	6.67	33.33	Thr	21617	192	88.3201	330.015	268.595	288.601	292.297	274.98
O75663 Y202	TIPRL	O75663	NP_001026970.1	Y202	RMNDTRLYHEADKTY	Tyr	31444	272	P34274		ZK688.9	38.43	56.94	T220	VLLRVCDTRIVGNEF	0	13.33	Thr	32890	281	87.793	21.27	36.9732	15.5669	17.7704	13.9063
Q13509 T312	TUBB3	Q13509	NP_006077.2	T312	PRHGRYLTVATVFRG	Thr	50433	450	P41937		tbb-4	88.67	94.89	T312	PRHGRYLTVAAMFRG	86.67	93.33	Thr	49782	444	87.776	148.99	143.039	124.991	136.245	122.851
O60391 S867	GRIN3B	O60391	NP_619635.1	S867	LPRIRKGSRLQYWLH	Ser	112992	1043		NP_506694	nmr-2	26.75	43.05	T743	KPPFRFGTVDGGNTH	26.67	33.33	Thr	112042	991	87.7538	218.851	194.647	193.116	197.42	144.162
P48736 S400	PIK3CG	P48736	NP_002640.2	S400	VLCQRRTSPKPFTEE	Ser	126454	1102	Q94125		age-1	25.72	47.29	S437	MIRPVNISGFDFPAD	13.33	33.33	Ser	136855	1182	87.7041	263.441	273.079	243.72	255.477	285.477
Q68DH5 Y461	LMBRD2	Q68DH5	NP_001007528.1	Y461	RIRVFNYYYLASHHQ	Tyr	81172	695	Q18695		C47G2.4	35.68	56.4	Y438	TIFRLQIYKYYHLDP	13.33	13.33	Tyr	73628	644	87.6694	1.25495	1.33504	3.5234	5.43903	11.0464
P55268 Y270	LAMB2	P55268	NP_002283.3	Y270	RREIREKYYYALYEL	Tyr	195981	1798	Q18823		lam-2	25.81	40.66	T172	YSGSCRATYGLSDRA	6.67	6.67	Thr	170219	1535	87.649	136.66	134.294	118.745	128.558	140.52
Q13507 S263	TRPC3	Q13507	NP_001124170.1	S263	KNDYRKLSMQCKDFV	Ser	97355	848	P34586		trp-1	34.47	52.87	S267	KETYLQLSEQCKQYS	46.67	60	Ser	118084	1027	87.5814	212.651	193.349	189.388	194.703	163.211
Q14204 S3554	DYNC1H1	Q14204	NP_001367.2	S3554	IARTEYLSNADERLR	Ser	532408	4646	Q19020		dhc-1	55.66	73.31	S3497	LARIEYLSTVDDRLQ	60	80	Ser	521560	4568	87.5586	40.4478	50.9026	22.4524	37.6975	0.107159
Q6ICG6 S353	C22orf9	Q6ICG6	NP_001009880.1	S353	NLRSRSLSGTGRSLV	Ser	45794	404		NP_509174	C16E9.2	32.39	46.61	S395	GPTNKLWSMRGFAQV	20	40	Ser	52582	457	87.4531	231.836	256.286	210.784	253.654	162.142
P39023 S65	RPL3	P39023	NP_000958.1	S65	REVDRPGSKVNKKEV	Ser	46109	403	P50880		rpl-3	71.46	85.86	S65	RDVDKPGSKVNKKEV	86.67	100	Ser	45641	401	87.4302	213.834	214.747	185.934	198.057	177.666
P78334 S384	GABRE	P78334	NP_004952.2	S384	LRHPRINSRAHARTR	Ser	57972	506	O18276		gab-1	30.73	49.27	S422	NNNFESTSKPKKRSS	13.33	33.33	Ser	62439	550	87.3783	183.854	182.644	166.688	174.755	139.562
Q12872 S846	SFRS8	Q12872	NP_004583.2	S846	RKRTRSRSPHEKKKK	Ser	104822	951	Q10580		swp-1	24.08	40.06	S645	ERKNTGRSDRREEAP	13.33	40	Ser	86291	749	87.2931	236.571	241.726	230.641	237.876	262.601
P41229 S809	KDM5C	P41229	NP_001140174.1	S809	RERRFPNSELLQQLK	Ser	175720	1560	Q23541		rbr-2	25.06	43.4	T809	KQNKYPQTDQVHKLI	13.33	66.67	Thr	170773	1477	87.2922	46.4366	51.8079	33.6847	47.5873	27.6315
O75386 S387	TULP3	O75386	NP_003315.2	S387	RGRVTQASVKNFQIV	Ser	49642	442	Q09306		tub-1	39.82	59.95	S371	HGRVTQASVKNFQII	86.67	93.33	Ser	48435	426	87.1522	62.367	60.9316	57.7885	59.9703	28.9028
P23786 S506	CPT2	P23786	NP_000089.1	S506	TETIRPASVYTKRCS	Ser	73777	658		NP_001040977	cpt-2	44.22	61.09	T500	TECMRSATSATRAAT	33.33	60	Thr	72529	646	86.6276	198.872	185.513	176.665	181.865	161.019
Q3SY69 Y511	ALDH1L2	Q3SY69	NP_001029345.2	Y511	RERGRLMYRLADLLE	Tyr	101746	923		NP_502054	alh-3	58.61	74.43	Y496	RERGKRLYKLAELME	60	93.33	Tyr	99259	908	86.4293	131.688	122.009	113.274	121.168	91.9307
O00192 S428	ARVCF	O00192	NP_001661.1	S428	CGALRNLSYGRDTDN	Ser	104642	962	Q9U308		jac-1	24.72	38.76	S761	CACLKNLSFGKENDA	46.67	73.33	Ser	138340	1254	86.3825	195.076	185.947	173.134	182.707	155.729
Q16629 S132	SFRS7	Q16629	NP_001026854.1	S132	RRRSRSRSRSHSRSR	Ser	27367	238	Q18409		rsp-6	47.9	51.68	S74	VRARVELSTGQRRGG	20	20	Ser	20463	179	86.3573	222.543	249.751	204.635	261.39	177.87
O75396 S35	SEC22B	O75396	NP_004883.2	S35	RDLQQYQSQAKQLFR	Ser	24741	215		NP_508198	sec-22	47.44	68.84	S35	DSSMVKYSNQAKMLF	6.67	20	Ser	24261	214	86.3086	145.814	136.146	134.584	126.832	101.124
O95477 S2054	ABCA1	O95477	NP_005493.2	S2054	GGNKRKLSTAMALIG	Ser	254286	2261	P34358		ced-7	24.94	43.03	S1504	DKLVRFYSGGQKRKI	13.33	13.33	Ser	191394	1704	86.1759	187.74	213.178	167.963	174.054	135.175
Q13813 S1346	SPTAN1	Q13813	NP_001123910.1	S1346	HDLQRFLSDFRDLMS	Ser	284539	2472		NP_508537	spc-1	58.58	75.16	S1305	YDYQRFLSDYRDLMQ	73.33	86.67	Ser	281735	2427	86.0826	305.782	272.886	280.447	274.213	254.509
P84085 Y154	ARF5	P84085	NP_001653.1	Y154	HLRSRTWYVQATCAT	Tyr	20530	180	Q10943		arf-1.2	79.56	88.4	Y154	SLRNRSWYIQATCAT	73.33	93.33	Tyr	20503	181	86.064	201.916	220.514	183.22	218.636	144.413
Q14964 S81	RAB39	Q14964	NP_059986.1	S81	RFRSITRSYYRNSVG	Ser	25007	217		NP_495984	rab-39	50.22	67.25	S86	KFRSITKSYYRNSVG	86.67	100	Ser	25955	229	85.9541	113.911	140.365	87.2092	133.585	63.9483
P30085 S137	CMPK1	P30085	NP_001129612.1	S137	RCLERGKSSGRSDDN	Ser	22222	196	Q20140		F38B2.4	40.95	60.95	T148	RLLHRAQTSGRADDN	60	80	Thr	22579	210	85.9468	289.807	260.677	267.943	262.068	265.957
P19388 T59	POLR2E	P19388	NP_002686.2	T59	RPRRTDLTVLVAHND	Thr	24551	210	Q9N5K2		rpb-5	76.78	88.63	T60	KPARSDLTILVAHND	73.33	93.33	Thr	24330	211	85.8764	21.9356	18.6726	7.45211	10.5129	-11.788
O75390 S451	CS	O75390	NP_004068.2	S451	FPLERPKSMSTEGLM	Ser	51712	466	P34575		cts-1	67.31	80.77	S453	LPLERPKSHSTDGLI	73.33	86.67	Ser	51522	468	85.8128	330.041	279.773	289.5	286.421	256.357
P21802 T762	FGFR2	P21802	NP_000132.3	T762	EDLDRILTLTTNEEY	Thr	92025	821	Q10656		egl-15	31.63	46.54	T933	DYLDWMLTMTNETIE	33.33	53.33	Thr	118938	1040	85.7212	271.534	231.6	235.804	234.16	226.667
O96013 S474	PAK4	O96013	NP_001014831.1	S474	KEVPRRKSLVGTPYW	Ser	64072	591	Q17850		pak-1	32.32	47.55	T448	PEQRKRTTMVGTPYW	53.33	73.33	Thr	63863	572	85.7062	233.432	225.347	218.948	222.797	213.444
Q12931 Y498	TRAP1	Q12931	NP_057376.2	Y498	RAGTRNIYYLCAPNR	Tyr	80110	704		NP_741220	R151.7	43.89	63.78	Y461	QEGQKEIYYMYANNR	46.67	66.67	Tyr	76575	672	85.6902	132.707	113.817	122.227	122.758	110.762
P07942 S329	LAMB1	P07942	NP_002282.2	S329	RPAEGRNSNACKKCN	Ser	198066	1786	Q18823		lam-2	26.93	44.23	S176	CRATYGLSDRAPILP	13.33	20	Ser	170219	1535	85.6132	81.9928	91.9676	75.058	76.6942	64.9317
P29074 S415	PTPN4	P29074	NP_002821.1	S415	GTRLRPSSVGHLVDH	Ser	105911	926	P28191		ptp-1	41.13	59.06	S460	SLRQQRLSKEAIYYG	13.33	26.67	Ser	115075	1026	85.5973	200.623	201.282	183.748	193.093	157.775
Q3SY17 Y81	MCART2	Q3SY17	NP_001029344.2	Y81	RDGFRNLYRGILPPL	Tyr	33721	297	P34519		K11H3.3	20.51	39.42	Y84	GHGFFGLYRGLSVLL	46.67	53.33	Tyr	34200	312	85.5956	127.456	114.043	110.475	113.947	120.824
P11055 S1258	MYH3	P11055	NP_002461.2	S1258	RTLEDQLSEARGKNE	Ser	223905	1940	P02566		unc-54	48.52	70.09	T1269	KQFELQLTELQSKAD	33.33	60	Thr	225108	1966	85.5381	171.132	168.574	159.174	151.29	158.807
P51159 T85	RAB27A	P51159	NP_004571.2	T85	QERFRSLTTAFFRDA	Thr	24868	221	Q94986		rab-3	41.18	65.16	T88	QERYRTITTAYYRGA	60	93.33	Thr	24741	219	85.295	151.034	168.297	145.587	151.696	121.026
O00194 T85	RAB27B	O00194	NP_004154.2	T85	QERFRSLTTAFFRDA	Thr	24608	218	Q94986		rab-3	42.01	67.58	T88	QERYRTITTAYYRGA	60	93.33	Thr	24741	219	85.295	151.034	168.297	145.587	151.696	121.026
Q14416 Y419	GRM2	Q14416	NP_000830.2	Y419	PVNGRRLYKDFVLNV	Tyr	95568	872	Q09630		mgl-1	39.94	55.66	Y510	NIDGSDFYQNYLLKV	26.67	66.67	Tyr	113258	999	85.2034	167.33	172.332	148.347	153.86	167.064
P84103 S120	SFRS3	P84103	NP_003008.1	S120	RRSPRRRSFSRSRSR	Ser	19330	164	Q18409		rsp-6	52.51	59.22	S108	YRGDRGRSRSRSRDR	60	60	Ser	20463	179	85.1167	240.045	227.53	221.757	243.346	200.674
Q5T4D3 T88	TMTC4	Q5T4D3	NP_001073137.1	T88	HKSYRPLTVLTFRIN	Thr	82991	741	Q20144		F38B6.6	36.03	53.71	T97	HKSYRPVTTFTFWLN	66.67	80	Thr	77719	690	85.0222	142.879	129.168	123.294	132.081	114.786
Q13247 S280	SFRS6	Q13247	NP_006266.2	S280	RSRSRSRSPKENGKG	Ser	39587	344	Q23120		rsp-2	45.93	59.01	S218	ARRRSPGSDRSDRKS	20	33.33	Ser	32403	281	84.9006	243.128	276.925	237.229	272.064	259.422
O60663 T201	LMX1B	O60663	NP_002307.1	T201	RRPKRPRTILTTQQR	Thr	42409	379	P20271		ceh-14	29.82	46.7	T185	GSNKRPRTTISAKSL	33.33	53.33	Thr	40037	351	84.8669	143.235	129.472	123.575	137.062	120.807
P51693 Y638	APLP1	P51693	NP_001019978.1	Y638	RELQRHGYENPTYRF	Tyr	72176	650	Q10651		apl-1	22.74	37.03	Y674	AGMQVNGYENPTYSF	60	73.33	Tyr	79416	686	84.79	250.944	226.687	232.457	217.157	192.35
P57058 S678	HUNK	P57058	NP_055401.1	S678	MLRKRHQSLQPSADR	Ser	79686	714	Q9TW45		par-1	21.56	34.56	T1051	PVSGRAGTIGASQGQ	13.33	40	Thr	126331	1192	84.7808	213.191	216.2	192.801	204.952	175.512
P41250 T347	GARS	P41250	NP_002038.2	T347	LIRVREFTMAEIEHF	Thr	83140	739	Q10039		gars-1	53.91	70.89	T357	LIRVREFTMCEIEHF	93.33	93.33	Thr	84131	742	84.7739	150.659	155.172	139.79	143.837	147.358
Q53H82 S12	LACTB2	Q53H82	NP_057111.1	S12	LQRVERLSNRVVRVL	Ser	32806	288	Q95Q18		Y53F4B.39	46.44	66.1	S14	VEPIEKLSDAVTRIL	40	80	Ser	33084	295	84.5508	80.5075	78.8618	52.662	83.8398	86.3784
P63173 Y43	RPL38	P63173	NP_000990.1	Y43	VRCSRYLYTLVITDK	Tyr	8218	70	O17570		rpl-38	78.57	91.43	Y43	VRCASYLYTLVVADK	73.33	86.67	Tyr	8058	70	84.4617	170.347	197.858	143.348	188.104	132.69
P61313 S34	RPL15	P61313	NP_002939.2	S34	CWQYRQLSALHRAPR	Ser	24146	204	P91374		rpl-15	76.47	86.76	S34	TWHYRQLSAVHRVPR	73.33	80	Ser	24106	204	84.4604	206.938	191.285	185.825	192.564	156.484
P14314 S24	PRKCSH	P14314	NP_001001329.1	S24	VKRPRGVSLTNHHFY	Ser	59425	528		NP_496073	ZK1307.8	36.74	56.44	S33	PVKGVPHSRLNLYQP	13.33	26.67	Ser	58044	507	84.4574	216.862	205.677	198.132	206.255	154.497
Q13547 Y172	HDAC1	Q13547	NP_004955.2	Y172	KYHQRVLYIDIDIHH	Tyr	55103	482	O17695		hda-1	59.54	77.59	Y176	KYHKRVLYVDIDVHH	80	100	Tyr	52119	461	84.4561	159.519	141.394	139.079	145.277	144.214
P30876 S893	POLR2B	P30876	NP_000929.1	S893	RYTKRDCSTFLRTSE	Ser	133897	1174	Q10578		rpb-2	77.87	88.85	S899	KYPKRDASTFLRSSE	73.33	86.67	Ser	134886	1193	84.3603	204.218	181.915	180.175	195.792	135.746
Q13393 T147	PLD1	Q13393	NP_001123553.1	T147	PIPTRRHTFRRQNVR	Thr	124184	1074		NP_494939	pld-1	35.95	51.02	Y229	TQERFDNYLEHMGID	0	13.33	Tyr	163517	1427	84.3302	222.674	196.744	197.635	212.553	209.847
Q64LD2 T510	WDR25	Q64LD2	NP_001154948.1	T510	RTASRACTLQGHTQA	Thr	60161	544	Q23256		wdr-5.3	20.96	39.15	T469	VQILEGHTTPVLATD	6.67	6.67	Thr	54455	501	84.1857	170.172	194.971	153.671	185.599	119.806
P33991 S326	MCM4	P33991	NP_005905.2	S326	RGRIAEPSVCGRCHT	Ser	96558	863	Q21902		mcm-5	28.16	46.93	T255	LFTERYLTDKVVPGN	0	6.67	Thr	84917	759	84.1784	56.3208	57.8251	54.5619	59.8889	46.5833
Q13618 Y539	CUL3	Q13618	NP_003581.1	Y539	FEIFRRFYLAKHSGR	Tyr	88930	768	Q17391		cul-3	49.68	69.11	T548	QYYTEKHTGRKLTIN	6.67	20	Thr	90217	777	83.9948	168.838	175.959	157.754	161.591	145.583
Q12965 S736	MYO1E	Q12965	NP_004989.2	S736	KKERRRNSINRNFIG	Ser	127062	1108		NP_492393	hum-1	56.95	71.75	S734	KKERRRYSLNRNFVG	80	93.33	Ser	124867	1100	83.9363	226.505	216.122	211.405	214.554	203.924
O00329 S520	PIK3CD	O00329	NP_005017.3	S520	EILERRGSGELYEHE	Ser	119479	1044	Q94125		age-1	26.06	44.16	S624	MLVKKHESGIVLEED	20	60	Ser	136855	1182	83.8943	317.19	285.942	295.1	290.825	277.624
P23396 T70	RPS3	P23396	NP_000996.2	T70	GRRIRELTAVVQKRF	Thr	26688	243	P48152		rps-3	73.28	83.4	T72	GRRIKELTSVVQKRF	86.67	100	Thr	27295	247	83.8075	159.284	169.174	136.729	153.831	136.044
O15105 S171	SMAD7	O15105	NP_005895.1	S171	RWPDLRHSSEVKRLC	Ser	46426	426	P45897		sma-4	20.53	35.09	T273	RVVSNRITSADQSLH	26.67	40	Thr	63351	570	83.7576	53.0099	53.2474	47.0145	46.7106	32.0143
O14678 S533	ABCD4	O14678	NP_005041.1	S533	PGEMQRLSFARLFYL	Ser	68597	606		NP_506620	pmp-3	38.18	58.64	S568	PGELQRLSLARVFYT	73.33	86.67	Ser	74981	660	83.7517	105.789	127.467	103.877	101.972	87.2047
Q4U2R6 Y116	MRPL51	Q4U2R6	NP_057581.2	Y116	NLNKRIRYLYKHFNR	Tyr	15095	128	Q22438		mrpl-51	25.63	38.69	Y156	ELRKRIKYLMMQHNY	46.67	53.33	Tyr	23618	199	83.7402	154.145	163.126	135.399	144.171	113.536
O95347 S486	SMC2	O95347	NP_001036015.1	S486	LEKRRQLSRDIGRLK	Ser	135656	1197	Q09591		mix-1	32.8	54.26	T496	TKLKDMDTRLLNSYK	13.33	40	Thr	140323	1244	83.7102	191.997	178.131	161.673	174.497	163.635
P14923 S380	JUP	P14923	NP_002221.1	S380	LWTLRNLSDVATKQE	Ser	81745	745	O44326		hmp-2	28.72	46.98	S355	ACACGTLSNLTCNNT	13.33	26.67	Ser	74493	678	83.6015	204.078	196.757	178.105	188.937	148.702
Q14562 S395	DHX8	Q14562	NP_004932.1	S395	RKRLTRISDPEKWEI	Ser	139315	1220	Q09530		mog-5	61.39	75.49	S366	GKARVRISTPERWEL	53.33	66.67	Ser	135741	1200	83.5708	72.5448	84.99	68.6288	79.4515	85.0057
Q14500 S221	KCNJ12	Q14500	NP_066292.2	S221	RVGNLRKSHIVEAHV	Ser	49001	433	P52192		irk-1	36.24	54.06	T251	RVGDMRNTHLVEAHV	66.67	93.33	Thr	57401	505	83.5379	57.0305	70.1579	50.2265	61.2489	43.608
P48050 S212	KCNJ4	P48050	NP_004972.1	S212	RVGNLRKSHIVEAHV	Ser	49500	445	P52192		irk-1	30.5	46.73	T251	RVGDMRNTHLVEAHV	66.67	93.33	Thr	57401	505	83.5379	57.0305	70.1579	50.2265	61.2489	43.608
O75386 S244	TULP3	O75386	NP_003315.2	S244	AARKRKKSKTANYLI	Ser	49642	442	Q09306		tub-1	39.82	59.95	S226	AARKRKKSTTANYLL	86.67	93.33	Ser	48435	426	83.5151	206.045	193.561	182.003	194.72	148.315
Q16348 S185	SLC15A2	Q16348	NP_066568.3	S185	EERTRYFSVFYLSIN	Ser	81783	729	O01840		pept-3	34.29	54.6	S219	MYKKHPPSKENVGSK	6.67	20	Ser	77949	701	83.4548	210.63	216.044	189.483	202.423	171.055
P20265 S360	POU3F2	P20265	NP_005595.2	S360	RKRKKRTSIEVSVKG	Ser	46893	443	P20268		ceh-6	39.28	50.34	S287	RKRKKRTSIEVNVKS	86.67	93.33	Ser	42556	380	83.4133	57.7277	76.387	54.5585	65.0831	51.7103
P49335 S284	POU3F4	P49335	NP_000298.2	S284	RKRKKRTSIEVSVKG	Ser	39427	361	P20268		P20268	41.05	52.37	S287	RKRKKRTSIEVNVKS	86.67	93.33	Ser	42556	380	83.4133	57.7277	76.387	54.5585	65.0831	51.7103
P04818 S57	TYMS	P04818	NP_001062.1	S57	RTGTGTLSVFGMQAR	Ser	35716	313		NP_491532	Y110A7A.4	62.62	73.8	S55	RTGTGTISIFGMQSK	73.33	100	Ser	35434	312	83.3472	56.229	44.4702	36.5154	50.4892	9.56837
Q16555 Y499	DPYSL2	Q16555	NP_001377.1	Y499	RGVPRGLYDGPVCEV	Tyr	62294	572	Q18677		dhp-2	45.63	62.76	T448	WANGQLKTVQGSGQF	0	13.33	Thr	56275	520	83.3465	141.446	140.289	116.202	124.326	104.473
O15382 Y352	BCAT2	O15382	NP_001181.2	Y352	CPVHRILYKDRNLHI	Tyr	44288	392	P54688		bcat-1	45.54	65.54	Y368	SPVGKILYHNKVTDE	33.33	53.33	Tyr	47323	415	83.3271	171.225	145.868	147.656	148.863	160.759
P24928 S480	POLR2A	P24928	NP_000928.1	S480	RVRILPWSTFRLNLS	Ser	217176	1970	P16356		ama-1	67.46	81.07	S470	RVKILPWSTFRMNLS	86.67	100	Ser	203961	1852	83.2974	44.897	59.6378	37.0355	48.3853	42.9284
P35555 T2733	FBN1	P35555	NP_000129.2	T2733	RGRKRRSTNETDASN	Thr	312298	2871	P34576		mua-1	22.3	36.08	Y3494	SAAGNDYYPDIGIPR	0	6.67	Tyr	417272	3767	83.2835	160.766	150.412	148.678	163.278	115.974
O60333 S910	KIF1B	O60333	NP_055889.2	S910	RLADRTPSPTFSTAD	Ser	204476	1816	P23678		unc-104	49.34	64.26	S738	LLTDTMYSPLPPDLL	26.67	26.67	Ser	179603	1584	83.2616	249.289	224.586	229.073	230.577	275.889
Q02779 T519	MAP3K10	Q02779	NP_002437.2	T519	RLRAIRLTPVDCGGS	Thr	103694	954	O01700		dlk-1	20.34	35.95	S525	DVQPCRGSPYRCSNT	20	46.67	Ser	103465	928	83.2172	40.43	48.6157	40.5028	45.873	93.411
Q08211 S1230	DHX9	Q08211	NP_001348.2	S1230	RGGFRGNSGGDYRGP	Ser	140958	1270	Q22307		rha-1	42.74	62.57	S1252	NNSGYGASGDWNAGR	26.67	26.67	Ser	144195	1301	83.1463	170.135	157.684	155.724	159.452	113.134
P34932 S76	HSPA4	P34932	NP_002145.3	S76	RFHGRAFSDPFVEAE	Ser	94331	840	Q05036		C30C11.4	42.02	59.17	S76	HLIGRKFSDPVAQRF	40	46.67	Ser	86878	776	83.1289	214.083	195.985	180.032	190.665	149.195
O75333 S154	TBX10	O75333	NP_005986.2	S154	RVHFHPDSPAKGAQW	Ser	42341	385	Q19691		tbx-2	35.46	51.3	S148	TLYIHPDSPSTGEHW	46.67	66.67	Ser	46979	423	83.0201	100.145	108.879	91.6809	96.5309	133.19
Q16718 Y28	NDUFA5	Q16718	NP_004991.1	Y28	HERLRILYTKILDVL	Tyr	13459	116	Q18359		C33A12.1	38.67	56	Y62	HRALTVVYGRILRAL	40	60	Tyr	17316	150	82.9528	144.176	143.738	131.084	133.327	126.817
P05108 S491	CYP11A1	P05108	NP_000772.2	S491	RVEIQHLSDVGTTFN	Ser	60102	521	Q09660		cyp-44A1	26.87	46.07	Y459	LAKLCGNYDIRHRGD	6.67	33.33	Tyr	56052	489	82.9182	48.9362	43.8005	40.1462	43.2579	13.6129
P46059 S252	SLC15A1	P46059	NP_005064.1	S252	KNRFRHRSKAFPKRE	Ser	78806	708	O01840		pept-3	34.04	54.24	S243	RKMVGGASRDKPVTH	13.33	26.67	Ser	77949	701	82.8353	209.576	220.186	190.702	202.455	153.742
P25092 S1052	GUCY2C	P25092	NP_004954.2	S1052	QKPRRVASYKKGTLE	Ser	123369	1073	Q09435		gcy-1	24.89	45.21	S1117	SHGSRPSSVYDPLQG	13.33	20	Ser	128085	1137	82.8209	204.097	179.152	169.95	180.783	148.238
O75934 S51	BCAS2	O75934	NP_005863.1	S51	RPTKNYLSYLTAPDY	Ser	26131	225		NP_498360	T12A2.7	36.55	57.98	T61	RPTKNYLTHLPVPDY	73.33	86.67	Thr	27616	238	82.8188	57.9075	38.0465	36.6304	44.4196	23.9825
O75533 Y830	SF3B1	O75533	NP_036565.2	Y830	MALDRRNYRQLVDTT	Tyr	145830	1304		NP_497853	T08A11.2	65.13	76.7	Y848	MAMDRRNYRQLVDTT	93.33	100	Tyr	147305	1322	82.7617	272.756	229.718	258.427	241.424	223.494
Q12756 S1685	KIF1A	Q12756	NP_004312.2	S1685	SKLSRRRSAQMRV__	Ser	191064	1690	P23678		unc-104	51.72	68.11	S1579	LKSPTSSSSIAAS__	15.38	23.08	Ser	179603	1584	82.6936	345.403	349.883	332.603	346.391	282.367
P20340 S81	RAB6A	P20340	NP_002860.2	S81	RFRSLIPSYIRDSTV	Ser	23593	208	Q22782		rab-6.2	80.29	87.02	S78	RFRSLIPSYIRDSTV	100	100	Ser	23346	205	82.6784	88.8927	118.569	75.2653	111.845	62.7761
Q13394 S111	MAB21L1	Q13394	NP_005575.1	S111	DGRKRSMSLWVEFIT	Ser	40956	359	Q20054		mab-21	56.04	74.45	S112	DGRKRSMSLWVEFIT	100	100	Ser	41504	364	82.6209	219.641	234.206	202.497	221.24	153.245
O75436 T141	VPS26A	O75436	NP_001030337.1	T141	VTIVRRLTDLVKEYD	Thr	38170	327	O01258		vps-26	57.87	74.72	T140	VTVIRRLTDLTKELD	73.33	86.67	Thr	40876	356	82.6206	168.372	167.994	153.552	158.346	156.434
O75928 Y205	PIAS2	O75928	NP_004662.2	Y205	LPGGRRDYTVQVQLR	Tyr	68240	621	Q94361		gei-17	23.46	39.85	Y288	DVTPLPRYELQLRFF	13.33	33.33	Tyr	89556	793	82.6046	173.519	145.759	162.157	149.074	131.768
P04049 S43	RAF1	P04049	NP_002871.1	S43	FGYQRRASDDGKLTD	Ser	73052	648	Q07292		lin-45	36.04	51.05	S47	DQASPMASPSTPLYP	20	20	Ser	90389	813	82.6033	225.9	208.875	209.629	211.301	211.532
P29074 T811	PTPN4	P29074	NP_002821.1	T811	KNESRPLTQIQYIAW	Thr	105911	926	P28191		ptp-1	41.13	59.06	T911	SSEERRVTQMQYIAW	60	80	Thr	115075	1026	82.5978	187.248	202.66	167.23	199.131	149.893
O60306 S477	AQR	O60306	NP_055506.1	S477	FNLFRLESTYEIRQD	Ser	171295	1485		NP_507684	emb-4	53.2	69.29	S487	FNLFQLESTYEIRQD	93.33	100	Ser	170150	1467	82.4613	300.683	265.191	277.625	270.336	240.007
P58304 S157	VSX2	P58304	NP_878314.1	S157	RHRTIFTSYQLEELE	Ser	39411	361	P41935		ceh-10	36.29	50.42	S158	LEKAFQDSHYPDIYA	6.67	26.67	Ser	38253	344	82.4475	46.0169	46.3763	28.6055	47.0051	10.0333
Q13574 S193	DGKZ	Q13574	NP_001099010.1	S193	RLSQRRPSGQHPGPG	Ser	124128	1117	Q10024		dgk-5	31.69	46.37	S109	IERSSNDSNEEHENV	6.67	13.33	Ser	105180	937	82.3991	185.078	177.721	180.361	179.431	163.003
Q13619 Y87	CUL4A	Q13619	NP_001008895.1	Y87	RYNLEELYQAVENLC	Tyr	87680	759	Q17391		cul-3	35.26	55.47	T110	AESWADHTVAMVMIR	6.67	33.33	Thr	90217	777	82.352	-25.7227	14.5035	-38.8024	-30.4566	-39.6336
Q14137 S571	BOP1	Q14137	NP_056016.1	S571	HQLSRRRSQSPFRRS	Ser	83630	746	Q9U2A9		Y48B6A.1	43.57	59.12	T512	KGHVQAVTFHPTQAR	6.67	26.67	Thr	77363	674	82.3426	335.687	349.169	317.043	336.031	268.703
Q16790 T443	CA9	Q16790	NP_001207.2	T443	RRQHRRGTKGGVSYR	Thr	49698	459	Q10462		cah-5	25.05	39.65	T295	ICSSFATTSVIITYV	13.33	26.67	Thr	34843	310	82.3309	158.83	147.543	145.636	157.834	136.9
A7E2Y1 S1264	MYH7B	A7E2Y1	NP_065935.2	S1264	RTYEDQLSEAKIKVE	Ser	221389	1941	P02566		unc-54	48.07	69.68	T1269	KQFELQLTELQSKAD	33.33	66.67	Thr	225108	1966	82.2044	74.3628	88.1695	58.0529	70.4332	63.7189
O43688 T51	PPAP2C	O43688	NP_003703.1	T51	RYPYRPDTITHGLMA	Thr	32574	288	Q10022		T28D9.3	30.79	46.92	T70	RYEYRKDTITAVQLM	53.33	60	Thr	39009	341	82.0864	153.084	135.686	143.374	138.28	127.617
Q5TCX8 S618	MLK4	Q5TCX8	NP_115811.2	S618	RPLSDGNSPWSTILI	Ser	113957	1036	O01700		dlk-1	20.46	35.81	T532	SPYRCSNTSSSSGVQ	20	40	Thr	103465	928	82.0773	233.906	223.003	220.971	229.349	226.045
O75390 S97	CS	O75390	NP_004068.2	S97	GIRFRGFSIPECQKL	Ser	51712	466	P34575		cts-1	67.31	80.77	S99	GIRFRGYSIPECQKL	93.33	100	Ser	51522	468	82.0277	206.948	197.111	192.029	198.643	178.973
P61960 S22	UFM1	P61960	NP_057701.1	S22	RLPYKVLSVPESTPF	Ser	9118	85	P34661		tag-277	79.79	87.23	S32	KLPFKVLSVPESTPF	86.67	100	Ser	9773	94	82.0191	28.2774	20.9014	18.5657	23.1026	30.673
O00160 S734	MYO1F	O00160	NP_036467.2	S734	KKERRRNSINRNFVG	Ser	124844	1098		NP_492393	hum-1	56.09	71.27	S734	KKERRRYSLNRNFVG	86.67	93.33	Ser	124867	1100	82.0027	224.799	214.473	209.82	212.839	202.341
Q14204 S3226	DYNC1H1	Q14204	NP_001367.2	S3226	RRDLRIKSQELEVKN	Ser	532408	4646	Q19020		dhc-1	55.66	73.31	S3169	QKSLKLKSNELQEKK	40	73.33	Ser	521560	4568	81.9255	185.869	170.415	159.71	176.752	141.937
Q13885 T312	TUBB2A	Q13885	NP_001060.1	T312	PRHGRYLTVAAIFRG	Thr	49907	445	P41937		tbb-4	93.03	97.98	T312	PRHGRYLTVAAMFRG	93.33	100	Thr	49782	444	81.8812	149.146	142.21	126.001	135.88	124.231
P52298 Y142	NCBP2	P52298	NP_001036005.1	Y142	RDEYRQDYDAGRGGY	Tyr	18001	156	Q93594		ncbp-2	60.26	77.56	Y139	RDEYRKDYDPERGGY	80	86.67	Tyr	17963	154	81.8682	147.978	137.73	148.082	131.239	117.311
P63146 S74	UBE2B	P63146	NP_003328.1	S74	PPTVRFLSKMFHPNV	Ser	17312	152	P52478		ubc-1	66.67	75	S74	PPTVKFISKMFHPNV	86.67	100	Ser	21494	192	81.7693	229.211	193.173	195.67	199.995	176.938
O75390 S225	CS	O75390	NP_004068.2	S225	RNLYREGSGIGAIDS	Ser	51712	466	P34575		cts-1	67.31	80.77	S227	RNLYRDGSAVSVIDP	60	73.33	Ser	51522	468	81.7606	284.505	246.477	264.682	253.903	210.926
Q13370 S1053	PDE3B	Q13370	NP_000913.2	S1053	PKPPRRKSRRRIFCQ	Ser	124333	1112	Q8I0P7		pde-3	26.53	38.22	T589	GSYEAQITCNGGTAV	0	13.33	Thr	69850	625	81.746	232.764	203.823	201.112	218.393	238.978
A3KMH1 S1475	KIAA0564	A3KMH1	NP_001009814.1	S1475	IPRSESLSPYTTWLS	Ser	214824	1905		NP_510160	F11C1.5	38.43	57.11	S1369	VPHSGNISLYQDWVA	33.33	66.67	Ser	204073	1804	81.7415	124.386	151.069	110.152	147.764	119.727
P55201 S891	BRPF1	P55201	NP_001003694.1	S891	HEVGRRTSVLFSKKN	Ser	137499	1214	Q20318		lin-49	22.57	40.2	S749	KSSDADVSSPKSSWL	13.33	13.33	Ser	117625	1042	81.5624	210.5	212.094	200.802	203.961	192.003
P27361 T312	MAPK3	P27361	NP_001035145.1	T312	DLLDRMLTFNPNKRI	Thr	43136	379	P39745		mpk-1	62.16	72.52	T366	DLLDKMLTFNPHNRI	80	93.33	Thr	50644	444	81.526	318.832	284.191	286.891	276.668	222.589
Q02127 S312	DHODH	Q02127	NP_001352.2	S312	GKPLRDLSTQTIREM	Ser	42867	395		NP_491930	dhod-1	49.64	66.91	S325	GAPVREISTECVRKI	40	86.67	Ser	45667	411	81.5209	197.955	184.378	171.39	178.703	139.922
O14495 S297	PPAP2B	O14495	NP_003704.3	S297	AIRKEILSPVDIIDR	Ser	35116	311	Q10022		T28D9.3	28.45	45.75	S301	PPRTPRNSEDEERHR	20	26.67	Ser	39009	341	81.5111	85.5033	89.8721	71.3266	85.6335	106.284
Q13753 T1132	LAMC2	Q13753	NP_005553.2	T1132	QKLSRAKTQINSQLR	Thr	130976	1193	Q18823		lam-2	22.8	38.7	Y1484	SNENLQYYKKQAEDD	0	26.67	Tyr	170219	1535	81.4338	276.734	279.836	256.188	270.374	237.2
Q15287 S287	RNPS1	Q15287	NP_006702.1	S287	RSPVRRRSRSPGRRR	Ser	34208	305	Q09511		rsp-4	21.97	32.46	S179	GSPKERRSRSRSASR	53.33	53.33	Ser	22569	196	81.4133	178.021	178.28	165.543	168.28	138.031
Q13418 T181	ILK	Q13418	NP_001014794.1	T181	RTRPRNGTLNKHSGI	Thr	51419	452		NP_497139	pat-4	56.44	75.54	T198	KSRTRDATLSRYTGV	33.33	86.67	Thr	52241	466	81.4017	162.974	147.283	138.955	149.008	112.542
O95602 S1280	POLR1A	O95602	NP_056240.2	S1280	KALKRVKSLKKQLTR	Ser	194811	1720		NP_001022450	Y48E1A.1	39.38	57.4	Y1312	KRELDRVYLKQLLKN	26.67	33.33	Tyr	195064	1737	81.3948	304.896	269.449	277.43	274.011	238.871
O43157 S1902	PLXNB1	O43157	NP_001123554.1	S1902	PPRPRRGSLRGGERE	Ser	232298	2135	O45657		plx-2	24.31	41.26	Y1541	PKSIPEVYLTRLLTS	13.33	13.33	Tyr	195762	1766	81.3365	254.057	209.26	210.95	231.332	219.267
Q14807 S171	KIF22	Q14807	NP_015556.1	S171	EGRPWALSVTMSYLE	Ser	73262	665	P46873		osm-3	28.18	45.78	S204	TLMNKDSSRSHSIFT	13.33	20	Ser	78760	699	81.2857	58.5873	62.3207	41.7815	50.643	48.8529
P51812 S386	RPS6KA3	P51812	NP_004577.1	S386	HQLFRGFSFVAITSD	Ser	83736	740	Q21734		rskn-1	57.65	71.56	S422	HEIFRGFSFVSNAVM	53.33	73.33	Ser	88102	784	81.0868	361.727	323.379	336.084	335.968	241.32
Q01130 S161	SFRS2	Q01130	NP_003007.2	S161	RSRSRSTSKSRSARR	Ser	25476	221	Q09511		rsp-4	51.58	65.16	S137	RSRSPRRSRSRTRSP	46.67	60	Ser	22569	196	81.0347	198.205	238.637	190.548	230.006	172.429
P07437 T312	TUBB	P07437	NP_821133.1	T312	PRHGRYLTVAAVFRG	Thr	49671	444	P41937		tbb-4	93.02	97.52	T312	PRHGRYLTVAAMFRG	93.33	100	Thr	49782	444	80.9905	149.601	142.563	125.082	136.336	122.946
P68371 T312	TUBB2C	P68371	NP_006079.1	T312	PRHGRYLTVAAVFRG	Thr	49831	445	P41937		tbb-4	93.93	98.43	T312	PRHGRYLTVAAMFRG	93.33	100	Thr	49782	444	80.9905	149.601	142.563	125.082	136.336	122.946
P04350 T312	TUBB4	P04350	NP_006078.2	T312	PRHGRYLTVAAVFRG	Thr	49586	444	P41937		tbb-4	93.47	97.97	T312	PRHGRYLTVAAMFRG	93.33	100	Thr	49782	444	80.9905	149.601	142.563	125.082	136.336	122.946
Q13523 S410	PRPF4B	Q13523	NP_003904.3	S410	EPERRRLSSPRTRPR	Ser	116973	1007		NP_492008	prpf-4	36.84	51.94	S303	EAKDLIKSTRFGSEQ	13.33	33.33	Ser	90931	775	80.8874	214.042	191.404	192.792	192.023	192.173
P13497 S235	BMP1	P13497	NP_001190.1	S235	PDRDRHVSIVRENIQ	Ser	111249	986	Q20176		nas-39	42.09	59.23	S180	QDYNFEKSKPEEVDS	20	26.67	Ser	107516	951	80.8872	233.817	221.768	202.005	218.432	189.106
P25787 T222	PSMA2	P25787	NP_002778.1	T222	EAGFRRLTPTEVKDY	Thr	25899	234	Q27488		pas-2	64.96	79.06	T220	STGFHRLTKQQVHDH	46.67	60	Thr	25317	231	80.8571	202.764	193.16	186.822	193.159	256.66
O60285 Y624	NUAK1	O60285	NP_055655.1	Y624	QNRPRPQYLKRYRNR	Tyr	74305	661	Q9TW45		par-1	22.48	35.82	S1096	EGDVKPRSLRFTWSM	13.33	46.67	Ser	126331	1192	80.8264	161.215	152.844	153.116	153.365	152.438
O00634 S502	NTN3	O00634	NP_006172.1	S502	EERARRGSSALWVPA	Ser	61466	580	P34710		unc-6	44.28	59.31	T536	ENMQRGETSLWISPQ	26.67	33.33	Thr	68423	612	80.7504	196.909	210.573	187.724	192.823	172.219
O95935 T356	TBX18	O95935	NP_001073977.1	T356	RPSLRTLTFEDIPGI	Thr	64753	607	P90971		mab-9	28.83	39.87	T95	AKFFDLGTEMIITKS	13.33	13.33	Thr	39417	346	80.6991	197.601	164.478	168.834	172.139	126.992
P35452 S23	HOXD12	P35452	NP_067016.3	S23	LNLQSPDSFYFSNLR	Ser	29031	270		NP_499573	php-3	27.27	41.09	T27	KSSDSHETHDESPTS	13.33	33.33	Thr	30519	275	80.692	191.619	162.147	186.255	167.075	137.593
O00764 S213	PDXK	O00764	NP_003672.1	S213	RRRNPAGSVVMERIR	Ser	35102	312	O01824		F57C9.1	41.74	61.99	S220	ESLRCYASVKGSHVY	13.33	20	Ser	35968	321	80.69	51.4091	69.2738	32.9709	59.2981	18.1178
O75891 Y490	ALDH1L1	O75891	NP_036322.2	Y490	RDRGRLMYRLADLME	Tyr	98829	902		NP_502054	alh-3	59.25	74.89	Y496	RERGKRLYKLAELME	60	93.33	Tyr	99259	908	80.6082	136.477	124.79	121.022	128.994	100.522
P17612 T198	PRKACA	P17612	NP_002721.1	T198	RVKGRTWTLCGTPEY	Thr	40590	351	P21137		kin-1	68.56	78.47	T235	RVKGRTWTLCGTPEY	100	100	Thr	46327	404	80.5912	179.867	165.625	151.819	166.998	144.889
P22694 T198	PRKACB	P22694	NP_002722.1	T198	RVKGRTWTLCGTPEY	Thr	40623	351	P21137		kin-1	66.34	77.48	T235	RVKGRTWTLCGTPEY	100	100	Thr	46327	404	80.5912	179.867	165.625	151.819	166.998	144.889
P22612 T198	PRKACG	P22612	NP_002723.2	T198	RVKGRTWTLCGTPEY	Thr	40434	351	P21137		kin-1	61.39	73.76	T235	RVKGRTWTLCGTPEY	100	100	Thr	46327	404	80.5912	179.867	165.625	151.819	166.998	144.889
P62820 S79	RAB1A	P62820	NP_004152.1	S79	RFRTITSSYYRGAHG	Ser	22678	205		NP_503397	rab-1	80.98	88.78	S79	RFRTITSSYYRGAHG	100	100	Ser	22527	205	80.3356	76.6142	69.5932	55.1798	69.1258	37.7723
P04406 S241	GAPDH	P04406	NP_002037.2	S241	RVPTANVSVVDLTCR	Ser	36053	335	P17329		gpd-2	75.07	86.8	S247	RVPTPDVSVVDLTAR	80	86.67	Ser	36437	341	80.3274	27.5686	38.4723	19.7921	26.4224	-1.15741
P36957 S9	DLST	P36957	NP_001924.2	S9	LSRSRCVSRAFSRSL	Ser	48729	453	Q19749		dlat-1	27.61	44.18	S17	TIGGLRPSTTAAISA	13.33	20	Ser	53448	507	80.2848	222.491	254.418	201.559	247.723	172.856
Q6NVY1 Y208	HIBCH	Q6NVY1	NP_055177.2	Y208	RLKGRDVYRAGIATH	Tyr	43482	386	P34559		ech-6	24.61	40.93	T119	GSFLSNWTAVSDVKK	0	6.67	Thr	31153	288	80.276	122.839	116.663	116.452	109.856	84.8964
Q15303 S679	ERBB4	Q15303	NP_001036064.1	S679	AVYVRRKSIKKKRAL	Ser	146808	1308	P24348		let-23	20.71	37.57	T691	DTEGVIETHCEKCSI	6.67	40	Thr	150493	1323	80.2122	220.08	210.413	207.699	211.642	208.378
O75317 S275	USP12	O75317	NP_872294.1	S275	LHRYTKLSYRVVFPL	Ser	42858	370	P34547		usp-46	59.15	70.66	S300	LNRHTKLSYRVVFPL	86.67	100	Ser	48259	426	80.0789	70.4055	65.6431	39.1658	70.4724	63.3567
P62068 S271	USP46	P62068	NP_001127695.1	S271	LHRYTKLSYRVVFPL	Ser	42442	366	P34547		usp-46	60.09	72.07	S300	LNRHTKLSYRVVFPL	86.67	100	Ser	48259	426	80.0789	70.4055	65.6431	39.1658	70.4724	63.3567
P16118 Y242	PFKFB1	P16118	NP_002616.2	Y242	HIQSRTVYYLMNIHV	Tyr	54681	471	Q21122		K02B2.1	49.26	67.09	Y236	HVQSRVVYFLMNIHL	73.33	93.33	Tyr	52072	457	79.9998	191.248	209.102	173.117	205.123	144.383
P49327 Y1924	FASN	P49327	NP_004095.4	Y1924	RSGIRTGYQAKQVRR	Tyr	273427	2511		NP_492417	fasn-1	41.52	60.62	Y2016	RTGIRTGYQARCVHF	66.67	80	Tyr	289207	2613	79.8757	137.866	131.738	119.249	124.046	93.2151
P11229 S451	CHRM1	P11229	NP_000729.2	S451	KIPKRPGSVHRTPSR	Ser	51421	460	Q9U7D5		gar-3	34.7	46.97	T602	KFKAERPTMNQGYVR	13.33	40	Thr	69544	611	79.8737	217.783	198.233	189.406	211.783	181.13
P43694 S262	GATA4	P43694	NP_002043.2	S262	IKPQRRLSASRRVGL	Ser	44565	442	P28515		elt-1	29.19	41.86	Y244	LCNACGLYFKMNHHA	6.67	13.33	Tyr	44804	416	79.8447	203.128	193.613	187.446	192.113	189.208
Q13247 S220	SFRS6	Q13247	NP_006266.2	S220	RSRSRSISKSRSRSR	Ser	39587	344	Q23120		rsp-2	45.93	59.01	S158	QAIVCFTSHDDLRDA	13.33	26.67	Ser	32403	281	79.8042	213.121	245.733	199.39	249.46	170.45
O00418 T254	EEF2K	O00418	NP_037434.1	T254	RDDNIRLTPQAFSHF	Thr	82144	725	O01991		efk-1	38.67	56.38	T237	VSNAARLTPQAFSHF	66.67	73.33	Thr	87807	768	79.7798	52.2287	47.7971	49.2617	51.0589	105.528
P61313 T197	RPL15	P61313	NP_002939.2	T197	AAWRRRNTLQLHRYR	Thr	24146	204	P91374		rpl-15	76.47	86.76	T197	KNWKRKNTKVFHRKR	46.67	60	Thr	24106	204	79.6651	164.318	155.929	157.049	158.495	147.354
Q00403 Y293	GTF2B	Q00403	NP_001505.1	Y293	RQSYRLIYPRAPDLF	Tyr	34833	316	O16991		ttb-1	60.13	78.48	Y283	RQTYKLLYPKALELF	60	93.33	Tyr	33083	306	79.6491	173.807	140.486	141.063	161.97	211.546
P20700 S304	LMNB1	P20700	NP_005564.1	S304	RMRIESLSSQLSNLQ	Ser	66408	586	Q21443		lmn-1	34.13	51.71	S313	VRDLETSSSGNASLI	26.67	53.33	Ser	64066	566	79.6371	32.9765	39.0746	28.1245	39.8131	19.1612
P48454 S483	PPP3CC	P48454	NP_005596.2	S483	RMPPRKDSIHAGGPM	Ser	58129	512	Q9XTT8		pph-4.2	28.91	41.41	S293	VTEENIDSDPVFEVF	13.33	13.33	Ser	36288	321	79.5768	190.85	168.463	177.239	170.681	131.376
P23921 S631	RRM1	P23921	NP_001024.1	S631	IYTRRVLSGEFQIVN	Ser	90070	792	Q03604		rnr-1	73.61	85.86	S632	PYTSNIYSRRVLSGD	20	33.33	Ser	88951	788	79.5009	202.427	186.696	177.426	188.572	152.676
P62333 S244	PSMC6	P62333	NP_002797.3	S244	AIGGRRFSEGTSADR	Ser	44173	389	O17071		rpt-4	78.57	89.9	S261	AIGGRRFSEGTSADR	100	100	Ser	45840	406	79.4771	198.823	187.983	188.686	191.328	175.658
Q5TKA1 S177	LIN9	Q5TKA1	NP_775106.2	S177	MGKPRRCSSAFFEEE	Ser	61946	542	P30630		lin-9	29.81	50.78	S276	LGKPRRCSKVFFEEE	80	86.67	Ser	73314	644	79.4502	206.632	217.671	189.117	197.445	174.043
P21281 S347	ATP6V1B2	P21281	NP_001684.2	S347	RVEGRNGSITQIPIL	Ser	56501	511	Q19626		vha-12	82	89.24	S327	RVEGRDGSITQIPIL	93.33	100	Ser	54732	491	79.4245	184.967	167.66	172.665	171.873	154.948
Q13573 S389	SNW1	Q13573	NP_036377.1	S389	RNENRDISEVIALGV	Ser	61494	536	Q22836		skp-1	55.97	72.01	S392	KERERDISEKIVLGL	53.33	66.67	Ser	60179	535	79.384	189.008	176.63	178.281	173.189	132.035
Q01851 S319	POU4F1	Q01851	NP_006228.3	S319	RFESLTLSHNNMIAL	Ser	42754	420	P13528		unc-86	30.84	41.76	S323	RFESLTLSHNNMVAL	93.33	100	Ser	52296	467	79.2851	101.854	108.622	71.9145	105.809	40.5908
Q15319 S237	POU4F3	Q15319	NP_002691.1	S237	RFESLTLSHNNMIAL	Ser	37052	338	P13528		unc-86	35.97	48.82	S323	RFESLTLSHNNMVAL	93.33	100	Ser	52296	467	79.2851	101.854	108.622	71.9145	105.809	40.5908
A6NKZ8 T213	NULL	A6NKZ8	NP_817124	T213	SQQYRALTVAELTQQ	Thr	41775	372	P41937		tbb-4	70.27	77.7	T285	SQQYRSLTVPELTQQ	86.67	93.33	Thr	49782	444	79.275	136.097	148.379	118.781	120.446	117.618
A6NNZ2 T285	NULL	A6NNZ2	NP_817124	T285	SQQYRALTVAELTQQ	Thr	49573	444	P41937		tbb-4	84.46	92.57	T285	SQQYRSLTVPELTQQ	86.67	93.33	Thr	49782	444	79.275	136.097	148.379	118.781	120.446	117.618
Q3ZCM7 T285	TUBB8	Q3ZCM7	NP_817124.1	T285	SQQYRALTVAELTQQ	Thr	49776	444	P41937		tbb-4	86.26	94.37	T285	SQQYRSLTVPELTQQ	86.67	93.33	Thr	49782	444	79.275	136.097	148.379	118.781	120.446	117.618
P12532 S50	CKMT1A	P12532	NP_001015001.1	S50	RRRLYPPSAEYPDLR	Ser	47037	417	Q10454		F46H5.3	38.61	53.72	Y52	IAKIEEGYAKLQAAP	6.67	26.67	Tyr	44149	396	79.2564	43.2248	43.3187	33.2471	48.5173	44.3576
O75896 S50	TUSC2	O75896	NP_009206.1	S50	FVFTRRGSMFYDEDG	Ser	12074	110	Q93196		C09E9.1	33.33	53.66	S60	LVHEAKSSQYIDEDG	40	53.33	Ser	14219	123	79.206	218.097	209.24	203.341	210.172	182.608
P39023 T346	RPL3	P39023	NP_000958.1	T346	GTKKRVLTLRKSLLV	Thr	46109	403	P50880		rpl-3	71.46	85.86	T343	GPKKRLITLRKSLIT	66.67	86.67	Thr	45641	401	79.1918	161.711	125.898	118.624	144.789	161.665
P53999 S73	SUB1	P53999	NP_006704.3	S73	IGKMRYVSVRDFKGK	Ser	14395	127	Q94045		T13F2.2	33.07	51.97	T72	IGNLRYATVSKFKGK	60	73.33	Thr	14428	124	79.1674	206.011	184.436	174.104	195.525	174.194
P36959 S41	GMPR	P36959	NP_006868.3	S41	RTFTFRNSKQTYSGI	Ser	37419	345	O16294		F32D1.5	67.32	82.4	S41	REYVFRNSKATYTGV	60	80	Ser	38788	358	79.1558	56.0482	58.5856	54.6544	59.984	35.7185
Q13813 S2009	SPTAN1	Q13813	NP_001123910.1	S2009	DDYGRDLSSVQTLLT	Ser	284539	2472		NP_508537	spc-1	58.58	75.16	S1969	EDFGRDLSSVQILLT	80	93.33	Ser	281735	2427	79.1537	187.99	171.386	163.906	167.638	132.311
O95232 S301	LUC7L3	O95232	NP_006098.2	S301	RSRSRHSSRTSDRRC	Ser	51466	432	Q09217		B0495.8	26.62	43.98	S183	VKTAGPGSNSAKLRV	13.33	33.33	Ser	36959	313	79.0631	196.379	216.612	178.071	216.899	128.565
Q13523 S422	PRPF4B	Q13523	NP_003904.3	S422	RPRDDILSRRERSKD	Ser	116973	1007		NP_492008	prpf-4	36.84	51.94	S315	SEQGSGASTPVSIQS	6.67	20	Ser	90931	775	78.978	94.62	54.3913	59.9071	78.2102	105.405
P27448 T530	MARK3	P27448	NP_001122390.1	T530	GGMTRRNTYVCSERT	Thr	87005	776	Q9TW45		par-1	39.85	51.09	T946	HNASFSVTPSSYQIP	6.67	20	Thr	126331	1192	78.9713	163.551	161.512	162.145	157.453	170.277
Q02388 S556	COL7A1	Q02388	NP_000085.1	S556	RTLVLPGSQTAFDLD	Ser	295220	2944	P17139		emb-9	29.42	36.51	Y190	GLPGNSGYPGLKGAK	6.67	6.67	Tyr	171068	1759	78.9462	139.432	112.742	128.184	117.892	94.6384
Q5VIR6 S201	VPS53	Q5VIR6	NP_001121631.1	S201	IPQIRQLSERVKAAQ	Ser	79653	699	P34561		vps-53	26.32	44.61	S191	SDQIANLSGQLDKLK	26.67	46.67	Ser	89225	798	78.9275	237.833	204.564	192.033	212.051	197.204
P09210 S18	GSTA2	P09210	NP_000837.3	S18	NIRGRMESIRWLLAA	Ser	25664	222	Q9N4X8		gst-10	28.83	51.35	Y17	TIRGFGEYIRLLFLD	46.67	46.67	Tyr	24777	210	78.9274	213.439	197.699	180.661	205.768	191.894
P41595 S306	HTR2B	P41595	NP_000858.3	S306	ETLMRRTSTIGKKSV	Ser	54298	481	O02213		ser-2	22.25	43.04	S286	VESARTSSRVGEKTP	26.67	53.33	Ser	50851	455	78.9015	336.812	299.841	318.484	314.425	278.576
P13497 S843	BMP1	P13497	NP_001190.1	S843	RMFLRFYSDNSVQRK	Ser	111249	986	Q20176		nas-39	42.09	59.23	S788	ELYLTFSSDASVSRR	46.67	66.67	Ser	107516	951	78.8611	195.408	173.617	174.505	180.382	136.931
A6NEE1 S436	NULL	A6NEE1	NP_001154970	S436	AATRRIKSCRFHRRR	Ser	59171	506	O45420		F31D4.5	28.6	48.07	S494	SIFDVAFSELDGHSL	6.67	13.33	Ser	66382	570	78.8562	205.465	177.551	171.124	195.661	193.95
O75912 S732	DGKI	O75912	NP_004708.1	S732	RIRVNKISLQDYEGF	Ser	116997	1065	Q10024		dgk-5	34.08	49.67	S622	TIDLFKRSWKDLCEY	26.67	46.67	Ser	105180	937	78.8364	47.4086	50.4058	39.8814	51.1873	18.4714
Q13393 Y103	PLD1	Q13393	NP_001123553.1	Y103	RVPSINLYTIELTHG	Tyr	124184	1074		NP_494939	pld-1	35.95	51.02	Y179	HFINTLLYTIELEHG	53.33	60	Tyr	163517	1427	78.7443	-0.462123	32.0034	-9.04123	22.1562	2.13318
O60870 S18	KIN	O60870	NP_036443.1	S18	AIANRIKSKGLQKLR	Ser	45374	393		NP_492860	Y52B11A.9	48.27	67.57	S18	DLANRTKSKGLQKLK	73.33	86.67	Ser	46382	404	78.714	185.388	175.088	164.784	171.566	132.826
P60002 S6	ELOF1	P60002	NP_115753.1	S6	__MGRRKSKRKPPPK	Ser	9462	83	Q9XVZ8		Y54G11A.11	67.86	77.38	S6	__MGKRKSKRKAPTK	76.92	84.62	Ser	9648	84	78.7059	240.6	211.618	205.189	232.148	244.349
Q0ZGT2 S503	NEXN	Q0ZGT2	NP_653174.3	S503	DVRPARKSEAPFTHK	Ser	80658	675	P41954		D1044.6	20.18	36.18	S632	TRRNFAISLSPKTDE	26.67	40	Ser	118043	1006	78.6896	72.59	101.561	68.2086	76.8411	59.8649
P61764 S328	STXBP1	P61764	NP_001027392.1	S328	KTTMRDLSQMLKKMP	Ser	67569	594	P34815		unc-18	52.15	67.46	S409	SKSIKDLSMLIKRMP	40	80	Ser	76715	673	78.6014	208.614	195.272	186.448	191.619	157.597
P26641 S387	EEF1G	P26641	NP_001395.1	S387	QELAFPLSPDWQVDY	Ser	50119	437	P54412		eef-1g	47.83	62.7	S350	DKLAFELSPDWQVDY	80	86.67	Ser	44369	398	78.591	202.918	181.46	183.316	180.91	238.51
P50990 S317	CCT8	P50990	NP_006576.2	S317	IMLVRLNSKWDLRRL	Ser	59621	548	Q9N358		cct-8	53.53	70.4	S350	IMAVRLTSKFDLRRL	80	86.67	Ser	63437	581	78.5607	300.46	274.406	278.542	270.207	231.874
O94887 S344	FARP2	O94887	NP_055623.1	S344	RGSSFRYSGRTQKQL	Ser	119888	1054	P28191		ptp-1	21.82	39.18	S334	FGSKFRYSGRTEYQT	66.67	73.33	Ser	115075	1026	78.5588	77.6331	105.958	60.8191	111.364	83.1196
Q15349 S218	RPS6KA2	Q15349	NP_001006933.1	S218	DHDKRAYSFCGTIEY	Ser	83239	733	Q21734		rskn-1	56.76	71.56	S263	DSEKKTYSFCGTVEY	66.67	86.67	Ser	88102	784	78.5316	269.883	264.429	236.601	253.004	168.764
P57088 T193	TMEM33	P57088	NP_060596.2	T193	FIYYRFLTLRYSSRR	Thr	27978	247	Q9XWV0		Y37D8A.17	38.01	60.15	S217	FAYYRFLSLRYASRR	80	93.33	Ser	29597	271	78.5096	171.256	139.87	134.393	157.805	173.893
Q6NXT2 S86	NULL	Q6NXT2	NP_001013721.2	S86	NTDLRFQSAAVGALQ	Ser	15214	135	Q10453		his-71	94.85	96.32	S87	KTDLRFQSAAIGALQ	86.67	93.33	Ser	15323	136	78.4712	186.685	193.52	167.687	169.063	127.791
Q15111 S128	PLCL1	Q15111	NP_006217.3	S128	LKKVRPNSRIYNRFF	Ser	122728	1095		NP_741067	pll-1	39.09	59.45	S102	FSLDADLSYIRWTPT	13.33	13.33	Ser	120024	1068	78.4087	199.019	186.784	178.861	187.634	155.38
P19634 S796	SLC9A1	P19634	NP_003038.2	S796	QRIQRCLSDPGPHPE	Ser	90763	815	P35449		nhx-9	33.13	52.52	T660	STGDLNATRRADFNV	0	6.67	Thr	75263	667	78.388	204.791	185.48	175.98	194.335	165.118
P51168 S570	SCNN1B	P51168	NP_000327.2	S570	RQRRAQASYAGPPPT	Ser	72659	640	Q21974		unc-8	25.74	43.37	S705	IGLWIGFSVITFAEF	6.67	6.67	Ser	89110	777	78.339	58.7803	63.0653	43.7077	55.7952	42.6715
P63252 S220	KCNJ2	P63252	NP_000882.1	S220	RVGNLRKSHLVEAHV	Ser	48288	427	P52192		irk-1	35.64	55.45	T251	RVGDMRNTHLVEAHV	73.33	93.33	Thr	57401	505	78.3069	51.7673	64.9428	44.8804	56.0836	37.138
O14494 S166	PPAP2A	O14494	NP_003702.2	S166	RVKEGRLSFYSGHSS	Ser	32156	284	Q10022		T28D9.3	28.45	46.63	S192	LVLEARKSFYSGHSA	66.67	73.33	Ser	39009	341	78.2533	100.477	87.4517	83.2528	107.318	34.1011
A9Z1Z3 Y1559	FER1L4	A9Z1Z3	NP_001034201	Y1559	RFVFRFDYLPTEREV	Tyr	200980	1794	Q17388		fer-2	20.45	37.51	Y1766	RFLLNFDYNPWEKKV	53.33	73.33	Tyr	235223	2034	78.2138	169.186	145.786	137.849	144.895	110.412
Q12872 S786	SFRS8	Q12872	NP_004583.2	S786	KSRSRSHSKAKHSLP	Ser	104822	951	Q10580		swp-1	24.08	40.06	S585	TPPVIPPSTQMQVDR	6.67	6.67	Ser	86291	749	78.1994	225.031	269.637	203.822	250.479	151.42
Q13243 S227	SFRS5	Q13243	NP_001034554.1	S227	RSRSRSKSRSVSRSP	Ser	31264	272	Q23121		rsp-1	50.32	65.06	S261	RSRSRSRSADNRKSR	53.33	66.67	Ser	35023	312	78.1406	208.336	247.391	190.985	242.181	158.47
A8MPY1 S427	GABRR3	A8MPY1	NP_001099050.1	S427	SRIKRRKSLGGHVGR	Ser	54272	467	O18276		gab-1	34.18	52	T421	QNNNFESTSKPKKRS	0	6.67	Thr	62439	550	78.1007	212.772	200.569	195.403	209.712	183.442
O15067 S1154	PFAS	O15067	NP_036525	S1154	RKRPDTFSLGVCNGC	Ser	144724	1338	Q19311		F10F2.2	47.51	64.11	S1161	RSRPDTFSYGVCNGC	86.67	86.67	Ser	148611	1343	78.0964	83.0101	92.027	76.0702	80.7017	56.7157
P54105 S71	CLNS1A	P54105	NP_001284.1	S71	HALSRDRSDCLGEHL	Ser	26215	237		NP_001021287	icln-1	29.96	45.57	S46	SAVIWISSAAGTKGF	13.33	26.67	Ser	22895	205	78.0348	332.295	328.832	307.345	327.482	258.626
O15428 Y24	PIN1L	O15428	NP_006212	Y24	RPSGRGYYFNHITNP	Tyr	11021	100		NP_494393	Y110A2AL.13	26.79	38.1	Y23	RSNDRVYYFNTATGR	46.67	53.33	Tyr	19158	168	77.8551	181.329	151.314	160.721	157.673	100.244
P54132 Y811	BLM	P54132	NP_000048.1	Y811	GHDFRQDYKRMNMLR	Tyr	159000	1417	O18017		him-6	26.53	40.3	T416	IALTATATPKIVTDA	0	13.33	Thr	110641	988	77.8181	175.789	137.442	151.781	155.831	153.758
O94887 S274	FARP2	O94887	NP_055623.1	S274	WSKVRKLSFKRKRFL	Ser	119888	1054	P28191		ptp-1	21.82	39.18	S266	WVRIRKLSFKKKQFQ	60	86.67	Ser	115075	1026	77.6201	228.528	218.082	212.938	216.316	181.324
P57059 S370	SIK1	P57059	NP_775490.2	S370	RPRSSDLSGLEVPQE	Ser	84902	783	Q9TW45		par-1	24.5	39.43	S580	PSSGSSSSRRSSQND	13.33	20	Ser	126331	1192	77.5949	79.152	92.8924	58.4029	93.1412	50.5141
Q6KC79 S892	NIPBL	Q6KC79	NP_056199.2	S892	EQKSRPDSPRVKQGD	Ser	316051	2804	Q95XZ5		pqn-85	25.14	43.47	S399	YFTYLFSSSITRMDK	6.67	13.33	Ser	252800	2203	77.5603	278.257	291.384	243.122	290.784	324.324
A2PYH4 Y678	HFM1	A2PYH4	NP_001017975.3	Y678	RLSTRDKYIQMLACR	Tyr	162610	1435	Q9U2G0		snrp-200	21.96	37.81	Y872	NHSELQYYLSLMNQQ	13.33	40	Tyr	243812	2145	77.5579	121.718	117.354	113.523	110.957	101.049
P41227 T152	NAA10	P41227	NP_003482.1	T152	YAMKRDLTQMADELR	Thr	26459	235		NP_501392	K07H8.3	57.02	66.81	S114	VSLHVRVSNRAALNL	6.67	33.33	Ser	21144	182	77.5559	149.587	127.748	125.891	130.536	106.334
P54840 S8	GYS2	P54840	NP_068776.2	S8	MLRGRSLSVTSLGGL	Ser	80989	703	Q9U2D9		gsy-1	50.92	67.14	S12	ARMPRNLSSNKIAKT	20	33.33	Ser	76441	672	77.5338	194.013	194.68	180.072	192.351	144.312
P05165 S393	PCCA	P05165	NP_000273.2	S393	LPSIGRLSQYQEPLH	Ser	77354	703	Q19842		pcca-1	58.01	74.03	S404	LPSVGRLSRYVEPKH	73.33	86.67	Ser	79744	724	77.4733	75.3926	58.4076	51.2188	64.9965	48.4677
P56537 S102	EIF6	P56537	NP_002203.1	S102	RRVEERLSALGNVTT	Ser	26599	245	O62106		eif-6	64.23	80.49	S102	RRVDERLSALGNVIA	80	86.67	Ser	26289	246	77.4644	52.1034	48.0384	37.6075	57.1564	46.7304
P38646 Y46	HSPA9	P38646	NP_004125.3	Y46	RLVSRRDYASEAIKG	Tyr	73680	679	P11141		hsp-6	73.78	84.54	S46	GTTNSCVSIMEGKTP	6.67	13.33	Ser	70826	657	77.4638	161.698	179.094	156.837	178.236	146.13
O95782 S238	AP2A1	O95782	NP_570603.2	S238	SRLSRIVSSASTDLQ	Ser	107546	977		NP_509572	apa-2	62.23	74.92	T237	SRLSRIVTATYTDLQ	73.33	86.67	Thr	104161	925	77.4099	303.193	307.459	277.914	302.73	222.855
A6NKF2 Y229	ARID3C	A6NKF2	NP_001017363.1	Y229	REGRRQAYTATPLFG	Tyr	44073	412	O02326		cfi-1	29.34	43.04	T297	REAPGRRTAPSFPLP	13.33	26.67	Thr	51771	467	77.3887	130.513	126.747	115.295	114.238	105.859
Q14160 S1486	SCRIB	Q14160	NP_056171.2	S1486	PAPERALSPAELRAL	Ser	174885	1630	O61967		let-413	20.37	30.86	T568	AGTQNMHTIRIQKDD	0	20	Thr	77331	699	77.3842	226.939	231.899	195.749	202.914	258.875
P23415 S354	GLRA1	P23415	NP_000162.2	S354	RKRRHHKSPMLNLFQ	Ser	52624	457	O18276		gab-1	32	49.82	S430	KPKKRSSSPIPPLCR	20	53.33	Ser	62439	550	77.3407	91.3562	95.0902	83.4154	95.6958	133.464
P57059 T268	SIK1	P57059	NP_775490.2	T268	VDPARRITIAQIRQH	Thr	84902	783	Q9TW45		par-1	24.5	39.43	S411	INPQRRSSLDNIMKD	26.67	60	Ser	126331	1192	77.3207	158.697	162.028	155.408	150.85	140.733
Q15417 Y189	CNN3	Q15417	NP_001830.1	Y189	YGTRRHLYDPKMQTD	Tyr	36414	329	P37806		unc-87	23.89	37.7	S369	ETTKMVDSKHPEYDH	6.67	13.33	Ser	62709	565	77.2942	155.85	138.595	132.614	141.351	128.138
O60573 S145	EIF4E2	O60573	NP_004837.1	S145	RLRKGLASRCWENLI	Ser	28362	245	Q22888		ife-4	43.27	57.96	T121	RLKKGLSTRIWENLL	66.67	93.33	Thr	24566	212	77.2735	61.0847	56.2893	29.8457	56.8496	-1.0842
P48664 T43	SLC1A6	P48664	NP_005062.1	T43	RTRLRLQTMTLEHVL	Thr	61565	564	Q10901		glt-1	44.33	63.12	S27	LLLVLTVSSVVLGAL	6.67	26.67	Ser	54657	503	77.208	147.906	139.834	128.552	141.653	106.705
P78413 S370	IRX4	P78413	NP_057442.1	S370	EAKPRIWSLAHTATA	Ser	54445	519	Q93348		irx-1	24.66	37.57	S257	SPIPNDDSESPKRKP	13.33	20	Ser	40765	377	77.199	185.932	185.15	172.609	172.685	142.328
Q12770 S483	SCAP	Q12770	NP_036367.2	S483	RQLAVRPSTPHTITL	Ser	139729	1279		NP_001022051	scp-1	23.06	40.66	T330	HLDLSTTTWGSEVYP	0	13.33	Thr	124644	1087	77.165	157.931	138.526	162.176	143.076	146.367
O95096 S154	NKX2-2	O95096	NP_002500.1	S154	FRQQRYLSAPEREHL	Ser	30133	273	P41936		ceh-22	29.19	42.77	S215	FRSQKYLSAPEREAL	80	86.67	Ser	37493	346	77.094	199.172	181.973	172.491	188.863	194.03
P24928 Y1383	POLR2A	P24928	NP_000928.1	Y1383	KALERELYHVISFDG	Tyr	217176	1970	P16356		ama-1	67.46	81.07	T1345	RQIDPVRTTSNDICE	0	20	Thr	203961	1852	77.0517	252.275	216.708	228.901	219.188	229.374
O15379 Y166	HDAC3	O15379	NP_003874.2	Y166	KYHPRVLYIDIDIHH	Tyr	48848	428	O17695		hda-1	52.49	70.72	Y176	KYHKRVLYVDIDVHH	80	93.33	Tyr	52119	461	77.0448	155.922	135.037	135.652	138.909	138.035
O95602 S1602	POLR1A	O95602	NP_056240.2	S1602	LDLRRLYSNDIHAIA	Ser	194811	1720		NP_001022450	Y48E1A.1	39.38	57.4	S1597	LDVNSVYSNDLNLIL	46.67	73.33	Ser	195064	1737	76.9161	306.973	272.792	280.618	277.166	259.488
P45844 S83	ABCG1	P45844	NP_004906.3	S83	NIEFRDLSYSVPEGP	Ser	75592	678	Q11180		wht-1	25.52	47.05	T34	GSSGAGKTTLMNVLT	0	13.33	Thr	66888	598	76.8912	184.773	175.578	162.028	165.127	130.389
O95428 Y110	PAPLN	O95428	NP_775733.3	Y110	RYRWLPYYSAPNKCE	Tyr	137700	1278	O76840		mig-6	22.52	32.72	Y151	NYHKWTPYKGKNKCE	40	40	Tyr	237582	2167	76.873	-1.9324	29.7011	-2.96007	2.52103	-1.32421
Q13510 T335	ASAH1	Q13510	NP_001120977.1	T335	FFLDDRRTPAKMCLN	Thr	44660	395	O45686		asah-1	38.73	62.03	T333	LYLDDRDTPGFRCMD	46.67	66.67	Thr	44805	393	76.8663	215.752	184.796	200.324	182.816	240.917
O15245 T347	SLC22A1	O15245	NP_003048.1	T347	TPRLRKRTFILMYLW	Thr	61188	554	Q9U539		"oct-1"	27.69	46.84	T360	TPNLRRKTLIVTYIW	53.33	80	Thr	65444	585	76.8385	213.419	189.216	194.014	193.242	127.815
O00217 T141	NDUFS8	O00217	NP_002487.1	T141	ADGSRRTTRYDIDMT	Thr	23705	210	Q22619		T20H4.5	64.15	75.47	T143	PDGSRRTTRYDIDMT	93.33	93.33	Thr	23852	212	76.8218	175.873	199.643	168.631	197.872	149.245
Q5T7P8 S315	SYT6	Q5T7P8	NP_995320.1	S315	ADRKLHLSVFDFDRF	Ser	57325	510	P34693		snt-1	33.53	51.96	S253	IYDFDRFSKHDQIGQ	13.33	13.33	Ser	49885	441	76.7886	50.6381	50.3807	37.5286	50.9873	16.1277
P78414 S463	IRX1	P78414	NP_077313.3	S463	FQPVRDNSLAPQEGT	Ser	49621	480	Q93348		irx-1	27.92	40.83	S360	LNSQAETSTPSPASS	6.67	20	Ser	40765	377	76.767	199.182	207.116	183.252	182.988	149.079
P07099 S350	EPHX1	P07099	NP_000111.1	S350	GGLERKFSLDDLLTN	Ser	52949	455		NP_504650	W01A11.1	46.15	64.62	T351	GGLNKRFTNDELLTI	53.33	80	Thr	51442	452	76.7606	297.739	273.367	276.715	267.725	256.969
Q12851 S8	MAP4K2	Q12851	NP_004570.2	S8	MALLRDVSLQDPRDR	Ser	91556	820	Q23356		mig-15	23.91	40.51	S13	LDEIDLNSLRDPAGI	26.67	46.67	Ser	122486	1096	76.7551	292.427	255.309	274.217	259.96	214.898
O14874 S226	BCKDK	O14874	NP_001116429.1	S226	GIICTRLSPKKIIEK	Ser	46360	412	Q02332		pdhk-2	24.51	42.48	Y212	RFLCDRYYLTSPSMK	20	26.67	Tyr	45263	401	76.7399	119.062	124.255	105.839	118.654	159.72
P78337 S98	PITX1	P78337	NP_002644.4	S98	RQRTHFTSQQLQELE	Ser	34128	314	P52906		unc-30	30.65	45.2	S121	RQRTHFTSHQLTELE	86.67	86.67	Ser	36184	323	76.7096	44.8281	45.0851	32.9656	45.7412	13.8137
P17066 T267	HSPA6	P17066	NP_002146.2	T267	RALRRLRTACERAKR	Thr	71028	643	P09446		hsp-1	77.92	89.58	T266	RALRRLRTACERAKR	100	100	Thr	69704	640	76.698	239.659	204.772	219.91	211.123	205.253
P48741 T267	HSPA7	P48741	NP_002146	T267	RALRRLRTACERAKR	Thr	40244	367	P09446		hsp-1	45.78	52.03	T266	RALRRLRTACERAKR	100	100	Thr	69704	640	76.698	239.659	204.772	219.91	211.123	205.253
O60704 S188	TPST2	O60704	NP_001008566.1	S188	MVRDGRASVHSMITR	Ser	41912	377	O77081		tpst-1	52.11	67.89	T189	MIRDGRATVNSIISR	66.67	100	Thr	43295	380	76.6946	93.2048	79.5532	79.0099	90.2718	54.8075
Q12849 T290	GRSF1	Q12849	NP_002083.3	T290	DYRGRRKTGEAYVQF	Thr	53126	480	Q22708		sym-2	24.27	37.86	T321	TRTDGRPTGDAFVQF	46.67	60	Thr	69158	618	76.6165	175.477	169.676	167.809	172.306	154.783
P04040 Y370	CAT	P04040	NP_001743.1	Y370	RHRLGPNYLHIPVNC	Tyr	59756	527	Q27487		ctl-2	60.53	75.9	Y366	FHRLGPNYIQLPVNC	73.33	86.67	Tyr	57448	500	76.6107	4.9466	7.02306	1.77782	10.621	-1.15194
O15047 S1534	SETD1A	O15047	NP_055527.1	S1534	QGTNRVLSERRSEQR	Ser	186034	1707	Q18221		set-2	20.97	35.85	S1349	LQRRLLTSLGDANND	6.67	20	Ser	171664	1507	76.5929	204.643	179.248	166.23	192.311	213.564
P62424 T52	RPL7A	P62424	NP_000963.1	T52	IQPKRDLTRFVKWPR	Thr	29996	266	Q966C6		rpl-7a	61.65	75.56	T53	IQPKKDVTRFVKWPK	80	100	Thr	30156	265	76.5726	149.323	141.127	130.48	131.385	112.463
O43304 Y329	SEC14L5	O43304	NP_055507.1	Y329	DIDGRPLYILRLGQM	Tyr	78942	696	Q03606		T23G5.2	45.06	64.81	Y342	DKAGRPMYILRFGQL	66.67	80	Tyr	81064	719	76.5463	147.971	140.556	129.791	133.05	139.885
P50238 S19	CRIP1	P50238	NP_001302.1	S19	YFAERVTSLGKDWHR	Ser	8533	77		NP_501187	valv-1	70.24	77.38	S19	YFAERVSSLGKDWHR	93.33	100	Ser	9058	84	76.5152	230.336	204.674	191.759	208.18	159.054
P18621 Y130	RPL17	P18621	NP_000976.1	Y130	PKMRRRTYRAHGRIN	Tyr	21397	184	Q9BL19		rpl-17	64.17	76.47	Y132	AKLRRRTYRAHGRIN	86.67	93.33	Tyr	21494	187	76.4304	156.759	155.36	148.158	145.768	144.928
Q12824 S42	SMARCB1	Q12824	NP_001007469.1	S42	YLRMFRGSLYKRYPS	Ser	44141	385		NP_497890	snfc-5	51.43	69.87	T44	YLRLHRGTLYKKYPL	66.67	86.67	Thr	42828	381	76.3759	75.5873	81.6738	70.8649	82.5624	57.0968
P09972 Y59	ALDOC	P09972	NP_005156.1	Y59	TEENRRLYRQVLFSA	Tyr	39456	364	P54216		aldo-1	64.21	75.68	Y59	TEENRRKYRQLLFTA	80	93.33	Tyr	39222	366	76.3756	163.584	164.116	148.064	155.129	127.782
Q14D04 S149	VEPH1	Q14D04	NP_078897.1	S149	KELCRNMSNYLSLAA	Ser	94745	833	O17237		K10B4.3	27.44	47.65	T152	GELVKNTTSYISLAA	53.33	80	Thr	97871	871	76.3673	299.239	269.837	279.438	269.408	252.456
P16435 S457	POR	P16435	NP_000932.3	S457	RLQARYYSIASSSKV	Ser	76690	677		NP_498103	emb-8	47.27	65.73	S449	RLQARYYSIASSPRL	80	93.33	Ser	75190	662	76.3532	178.738	175.09	164.673	168.322	144.256
P11055 S1479	MYH3	P11055	NP_002461.2	S1479	LKESRSLSTELFKLK	Ser	223905	1940	P02566		unc-54	48.52	70.09	S1490	QRDLRNTSTDLFKAK	46.67	73.33	Ser	225108	1966	76.3352	202.76	229.338	187.227	219.83	134.48
P50750 T191	CDK9	P50750	NP_001252.1	T191	RYTNRVVTLWYRPPE	Thr	42778	372	Q9TVL3		cdk-9	43.31	56.49	T261	LYTNRVVTLWYRPPE	93.33	93.33	Thr	53575	478	76.3288	149.003	134.498	135.245	139.427	132.736
P26045 S359	PTPN3	P26045	NP_001138840.1	S359	PAMRRSLSVEHLETK	Ser	103990	913	P28191		ptp-1	36.55	53.7	S376	TFSGNTQSIDSSRYT	6.67	26.67	Ser	115075	1026	76.326	193.842	192.159	171.666	184.374	155.772
Q2TAA5 S386	ALG11	Q2TAA5	NP_001004127	S386	DELKNYLSEATIGLH	Ser	55651	492	P53993		B0361.8	43.7	62.2	S365	EDLVVELSKALISIH	40	66.67	Ser	53628	470	76.2903	143.822	133.385	126.501	118.892	88.8347
Q13393 S342	PLD1	Q13393	NP_001123553.1	S342	LKDHRFGSYAAIQEN	Ser	124184	1074		NP_494939	pld-1	35.95	51.02	S518	LQPHRFSSSFPVREN	46.67	66.67	Ser	163517	1427	76.2483	198.37	203.362	177.248	184.417	146.669
O75306 S340	NDUFS2	O75306	NP_004541.1	S340	RVEEMRQSLRIIAQC	Ser	52546	463	Q93873		gas-1	62.45	76.35	S359	RIEEMRQSLNIVHQC	73.33	86.67	Ser	54544	482	76.2333	78.314	62.7611	63.3034	80.4772	88.8543
P50607 S307	TUB	P50607	NP_003311.2	S307	AGRKRKKSKTSNYLI	Ser	55651	506	Q09306		tub-1	41.3	57.91	T228	RKRKKSTTANYLLST	13.33	26.67	Thr	48435	426	76.2193	202.128	186.816	180.381	191.608	141.558
P30038 T18	ALDH4A1	P30038	NP_003739.2	T18	ALLSRPWTGAGLRWK	Thr	61719	563		NP_493946	alh-6	54.35	71.58	S18	ITQKCAASTYSGLTS	0	6.67	Ser	61733	563	76.217	274.866	293.971	259.453	273.794	223.264
P15104 T301	GLUL	P15104	NP_001028216.1	T301	LDNARRLTGFHETSN	Thr	42064	373	P34497		gln-2	55.5	68.1	Y294	HLEAMKVYDPHGGED	13.33	33.33	Tyr	41265	367	76.1698	175.882	180.602	151.629	172.001	130.255
P13807 T589	GYS1	P13807	NP_002094.2	T589	RIIQRNRTERLSDLL	Thr	83786	737	Q9U2D9		gsy-1	49.66	65.81	T536	YYEPWGYTPAECTVM	6.67	20	Thr	76441	672	76.1485	144.043	113.067	115.891	131.812	154.682
P12882 S1261	MYH1	P12882	NP_005954.3	S1261	RALEDQLSEIKTKEE	Ser	223145	1939	P02566		unc-54	49.14	70.09	T1269	KQFELQLTELQSKAD	33.33	73.33	Thr	225108	1966	76.1369	186.558	171.199	157.09	163.708	150.001
P53355 S725	DAPK1	P53355	NP_004929.2	S725	RRRPRLSSTNSSRFP	Ser	160073	1430		NP_490840	dapk-1	34.55	54.48	T720	GKTRLVQTLHSSRGI	20	46.67	Thr	158950	1425	76.1089	189.385	168.755	163.013	179.997	151.668
Q5JSH3 S775	WDR44	Q5JSH3	NP_061918.3	S775	LYDLRDLSLSMKYKG	Ser	101366	913		NP_510361	sym-4	30.11	47.84	T883	DIRDKALTCKFKGVQ	13.33	26.67	Thr	115056	1043	76.0865	195.71	176.319	176.514	175.512	143.854
P28069 S179	POU1F1	P28069	NP_000297.1	S179	RFENLQLSFKNACKL	Ser	32912	291	P20268		ceh-6	34.21	46.32	S242	RFEALQLSFKNMCKL	86.67	86.67	Ser	42556	380	76.0559	103.643	84.6117	89.7862	87.8982	31.197
Q5VT25 S1212	CDC42BPA	Q5VT25	NP_003598.2	S1212	KNKFRDRSVYVPKEA	Ser	197307	1732	P92199		let-502	24.48	42.38	T706	QLMDSRNTDERVLSL	0	13.33	Thr	135756	1173	75.9839	203.385	212.406	175.873	189.816	143.422
O94804 S417	STK10	O94804	NP_005981.3	S417	LRKSRPVSMDARIQV	Ser	112135	968	Q9NB31		cst-1	22.73	34.19	S114	MEYCGAGSISDIMRA	6.67	33.33	Ser	55620	497	75.8881	227.769	247.896	201.171	248.836	213.476
P52735 S836	VAV2	P52735	NP_001127870.1	S836	ARDMRELSLREGDVV	Ser	101289	878	Q45FX5		vav-1	25.92	42.8	S950	NNEGKFLSFKTGDIV	33.33	60	Ser	113536	1007	75.7457	207.485	170.609	163.433	194.135	206.685
P19447 S301	ERCC3	P19447	NP_000113.1	S301	EYDFRNDSVNPDINI	Ser	89278	782		NP_499487	Y66D12A.15	63.37	77.19	T308	EYDFRNDTLNPNLGI	66.67	93.33	Thr	89492	789	75.7331	218.366	206.176	198.454	195.921	170.745
O00267 S375	SUPT5H	O00267	NP_001104490.1	S375	RKGFLFKSFAMSAVI	Ser	121000	1087	Q21338		spt-5	39.65	57.04	Y377	RRGFLYKYFPINAIQ	46.67	80	Tyr	133339	1208	75.6931	70.8613	85.1207	71.1222	72.3632	42.3305
P26232 S151	CTNNA2	P26232	NP_004380.2	S151	ADVMRLLSHLKIVEE	Ser	105313	953	P90947		hmp-1	35.99	57.08	T164	HQMIEADTKIKVDDL	6.67	46.67	Thr	103976	927	75.6765	212.469	202.847	169.965	197.147	154.404
O94810 S244	RGS11	O94810	NP_003825.1	S244	LGRTRVKSSVCLEAY	Ser	52946	467	P49809		egl-30	20.54	38.56	S284	SSGGESPSTSSAAAG	13.33	20	Ser	63260	555	75.6313	193.25	199.913	175.096	185.494	156.888
P57053 S39	H2BFS	P57053	NP_542160	S39	RSRKESYSVYVYKVL	Ser	13944	126	Q27894		his-54	77.78	86.51	Y38	RKESYSVYIYRVLKQ	20	26.67	Tyr	13553	123	75.5516	35.2559	65.3479	34.2063	48.8247	4.39294
P62807 S39	HIST1H2BC	P62807	NP_003509.1	S39	RSRKESYSVYVYKVL	Ser	13906	126	P04255		his-15	80.95	88.1	Y37	RKESYSVYIYRVLKQ	20	26.67	Tyr	13482	122	75.5516	35.2559	65.3479	34.2063	48.8247	4.39294
P58876 S39	HIST1H2BD	P58876	NP_066407.1	S39	RSRKESYSVYVYKVL	Ser	13936	126	Q27894		his-54	80.16	87.3	Y38	RKESYSVYIYRVLKQ	20	26.67	Tyr	13553	123	75.5516	35.2559	65.3479	34.2063	48.8247	4.39294
O60814 S39	HIST1H2BK	O60814	NP_542160.1	S39	RSRKESYSVYVYKVL	Ser	13890	126	P04255		his-15	80.16	88.1	Y37	RKESYSVYIYRVLKQ	20	26.67	Tyr	13482	122	75.5516	35.2559	65.3479	34.2063	48.8247	4.39294
Q5QNW6 S39	HIST2H2BF	Q5QNW6	NP_001019770.1	S39	RSRKESYSVYVYKVL	Ser	13920	126	Q27484		his-41	80.16	87.3	Y38	RKESYSVYIYRVLKQ	20	26.67	Tyr	13527	123	75.5516	35.2559	65.3479	34.2063	48.8247	4.39294
O75489 S205	NDUFS3	O75489	NP_004542.1	S205	FRKDFPLSGYVELRY	Ser	30242	264		NP_491881	nuo-2	36.63	48.54	S379	FRKDYPLSGYNEVRY	80	93.33	Ser	51199	445	75.5328	68.3797	66.5965	36.3784	64.8395	44.6874
O14810 Y70	CPLX1	O14810	NP_006642.1	Y70	RQGIRDKYGIKKKEE	Tyr	15030	134	Q9GUM7		cpx-1	28.67	41.96	Y72	RQGIRDKYAIKKKEE	93.33	93.33	Tyr	15925	143	75.5299	154.556	147.374	131.007	141.173	128.183
P49640 S314	EVX1	P49640	NP_001980.1	S314	LDTFRVLSQPYPRPE	Ser	42440	407	Q93899		vab-7	26.29	36.61	T155	AYEMWMKTAAASQFG	0	20	Thr	26800	247	75.4686	187.647	171.718	161.233	172.805	138.952
O43316 S292	PAX4	O43316	NP_006184.2	S292	TAPERCLSDTPPKAC	Ser	37833	350		NP_001024570	vab-3	36.26	48.57	T394	FPYPRMPTNGHGFQQ	6.67	20	Thr	51043	455	75.433	204.929	203.263	175.986	187.789	156.09
P28482 S142	MAPK1	P28482	NP_002736.3	S142	RGLKYIHSANVLHRD	Ser	41390	360	P39745		mpk-1	64.41	70.95	S213	RGLKYIHSANVLHRD	100	100	Ser	50644	444	75.4192	142.074	137.253	127.161	119.282	90.5301
P27361 S159	MAPK3	P27361	NP_001035145.1	S159	RGLKYIHSANVLHRD	Ser	43136	379	P39745		mpk-1	62.16	72.52	S213	RGLKYIHSANVLHRD	100	100	Ser	50644	444	75.4192	142.074	137.253	127.161	119.282	90.5301
Q15477 T376	SKIV2L	Q15477	NP_008860.4	T376	KFRDFRNTFGDVGLL	Thr	137799	1246	Q23223		mtr-4	32.18	49.12	Y237	KEVGWVVYDEIHYMR	6.67	20	Tyr	116352	1026	75.4087	91.8854	73.8939	73.6763	81.783	34.2482
O60271 Y629	SPAG9	O60271	NP_001124000.1	Y629	REQKREQYRQVKAHV	Tyr	146205	1321	P34609		unc-16	38.61	56.32	S495	DSVTPPASSRGNRAS	0	6.67	Ser	130462	1157	75.3697	124.646	127.12	112.545	114.133	107.524
Q00266 S170	MAT1A	Q00266	NP_000420.1	S170	RMADLRRSGLLPWLR	Ser	43648	395	P50305		sams-3	68.32	83.17	S158	KLHELRRSGELEWVR	53.33	80	Ser	44016	404	75.3119	46.9619	37.1554	41.3507	43.1628	20.6416
P60900 T231	PSMA6	P60900	NP_002782.1	T231	NPKFRILTEAEIDAH	Thr	27399	246	O17586		pas-1	56.5	75.61	T231	NSKFTKLTSDQVEHH	40	60	Thr	27030	246	75.2078	155.536	140.104	134.444	131.542	122.311
O43314 Y822	HISPPD1	O43314	NP_056031.2	Y822	RHVRTRLYFTSESHV	Tyr	140407	1243	P91309		F46F11.1	43.76	60.39	Y840	RHVRTRLYFTSESHI	93.33	100	Tyr	150102	1323	75.1856	48.1375	39.798	39.8081	49.9852	13.8021
Q13617 S417	CUL2	Q13617	NP_003582.2	S417	EVEDRLTSFITVFKY	Ser	86983	745	Q17390		cul-2	43.04	64.18	S434	DLEAKLDSAIVIFRY	40	73.33	Ser	89707	776	75.1805	248.909	224.909	226.708	230.41	165.403
Q5T9S5 T278	CCDC18	Q5T9S5	NP_996769.2	T278	EILERNLTNCEKENK	Thr	168962	1454	P02566		unc-54	20.24	40.03	T447	LVKKCNLTLDQKGID	26.67	46.67	Thr	225108	1966	75.1805	261.463	222.536	233.959	228.823	249.156
P40616 Y82	ARL1	P40616	NP_001168.1	Y82	RPYWRCYYSNTDAVI	Tyr	20418	181	Q20758		arl-1	71.82	82.87	Y81	RPYWRCYYANTDAII	86.67	100	Tyr	20086	180	75.1667	150.286	119.029	131.269	125.029	99.2246
Q13237 S285	PRKG2	Q13237	NP_006250.1	S285	RNFLRSVSLLKNLPE	Ser	87432	762	O76360		egl-4	45	64.23	S318	MNFLTKVSIFQNLSE	53.33	66.67	Ser	86723	780	75.1666	190.435	186.741	174.064	187.836	137.168
O95347 T574	SMC2	O95347	NP_001036015.1	T574	GELKRRYTIIPLNKI	Thr	135656	1197	Q09591		mix-1	32.8	54.26	T581	KAFTSRKTMIPVSEN	26.67	53.33	Thr	140323	1244	75.1349	272.798	267.284	262.254	247.487	238.432
O43745 S47	CHP2	O43745	NP_071380.1	S47	RNKKGYLSRMDLQQI	Ser	22452	196	P36608		ncs-1	28.06	45.92	T44	DCPNGMLTEAGFQKI	26.67	40	Thr	22003	191	75.1266	33.9795	39.4005	16.9635	32.1614	3.39082
P41223 Y75	BUD31	P41223	NP_003901.2	Y75	KAISRELYEYCIKEG	Tyr	17000	144	P34313		C07A9.2	68.03	84.35	Y78	AEISRELYEFCLTAK	53.33	66.67	Tyr	17104	147	75.0665	169.002	196.501	140.393	182.428	128.585
Q15111 S862	PLCL1	Q15111	NP_006217.3	S862	KAQKRSLSVRMGKKV	Ser	122728	1095		NP_741067	pll-1	39.09	59.45	S822	KAKKRGMSVKRKNSR	40	60	Ser	120024	1068	75.0659	209.54	194.039	174.548	204.601	172.929
Q6DWJ6 S61	GPR139	Q6DWJ6	NP_001002911.1	S61	LVARRQKSSYNYLLA	Ser	40679	353	Q11082		B0563.6	22.58	42.17	S90	EYLAKNGSSINQYKL	20	26.67	Ser	50008	434	75.0434	187.706	172.669	165.756	174.015	151.155
O43897 S932	TLL1	O43897	NP_036596.3	S932	RGSRLELSFQTFEVE	Ser	114709	1013	Q20176		nas-39	42.55	59.23	Y871	QYDYIEIYDGPEATL	6.67	26.67	Tyr	107516	951	75.0135	55.4417	54.2264	41.0504	54.4435	15.8485
O95391 T261	SLU7	O95391	NP_006416.3	T261	FDSKRRITVRNLRIR	Thr	68387	586	Q21278		K07C5.6	42.66	60.28	T236	MDSRTRITVRNLRIR	80	86.67	Thr	74442	647	75.0035	159.842	145.652	135.015	155.965	166.883
O15235 S75	MRPS12	O15235	NP_066930.1	S75	RKPKKPNSANRKCCR	Ser	15173	138		NP_508023	mrps-12	45.86	52.87	S93	RHPKKPNSGNRKCAI	73.33	73.33	Ser	17352	157	74.9917	45.7507	44.3223	37.2517	42.4777	43.677
P12532 S10	CKMT1A	P12532	NP_001015001.1	S10	GPFSRLLSARPGLRL	Ser	47037	417	Q10454		F46H5.3	38.61	53.72	S10	HRCSRVLSQFLGRGN	33.33	40	Ser	44149	396	74.9844	244.991	244.588	194.839	246.344	199.499
P20309 T175	CHRM3	P20309	NP_000731.1	T175	FSITRPLTYRAKRTT	Thr	66128	590	Q9U7D5		gar-3	35.35	52.21	S172	FSVTRPLSYRPRRTT	73.33	93.33	Ser	69544	611	74.957	156.879	124.583	123.445	143.761	163.339
O95096 S136	NKX2-2	O95096	NP_002500.1	S136	RKRRVLFSKAQTYEL	Ser	30133	273	P41936		ceh-22	29.19	42.77	T197	RKRRVLFTKAQTYEL	93.33	100	Thr	37493	346	74.8294	54.0019	78.4664	38.8657	58.3067	29.3061
Q08499 Y126	PDE4D	Q08499	NP_001098101.1	Y126	RAMDRTSYAVETGHR	Tyr	91115	809	Q22000		pde-4	44.87	59.58	S27	GGGFGFSSLRRELHL	13.33	13.33	Ser	75370	674	74.7436	148.484	125.228	128.95	129.285	119.304
P15313 S341	ATP6V1B1	P15313	NP_001683.2	S341	RVEGRGGSITQIPIL	Ser	56833	513	Q19626		vha-12	79.14	87.13	S327	RVEGRDGSITQIPIL	93.33	93.33	Ser	54732	491	74.7067	179.045	161.562	166.694	165.889	148.907
Q14204 S2681	DYNC1H1	Q14204	NP_001367.2	S2681	YGTQRVISFIRQMVE	Ser	532408	4646	Q19020		dhc-1	55.66	73.31	S2623	YGTQRVISFLRQLVE	86.67	100	Ser	521560	4568	74.6824	243.959	238.636	227.507	235.316	178.041
Q13099 S459	IFT88	Q13099	NP_006522.2	S459	KKDSRVKSAAATNLS	Ser	94270	833		NP_508511	osm-5	43.94	63.51	S437	SQDSKTASAAANNLC	53.33	66.67	Ser	92251	820	74.6791	205.941	233.674	183.415	215.85	144.662
Q13243 S196	SFRS5	Q13243	NP_001034554.1	S196	RSRSRTRSSSRSRSR	Ser	31264	272	Q23121		rsp-1	50.32	65.06	S230	RRRSRSRSSSRSKSR	80	93.33	Ser	35023	312	74.6643	218.86	238.456	190.972	242.281	169.989
P61106 S79	RAB14	P61106	NP_057406.2	S79	RFRAVTRSYYRGAAG	Ser	23897	215		NP_510572	rab-14	83.72	88.37	S79	RFRAVTRSYYRGAAG	100	100	Ser	23370	210	74.6442	76.9624	69.6244	55.395	69.1459	36.6173
P23919 S195	DTYMK	P23919	NP_036277.2	S195	HEDIRVLSEDAIRTA	Ser	23819	212	Q22018		R53.2	40.37	64.22	Y203	EKNVFRIYENLDREK	13.33	46.67	Tyr	24324	218	74.636	194.848	179.784	169.139	176.651	158.256
P51805 S1600	PLXNA3	P51805	NP_059984.2	S1600	RSLSRYESLLRTASS	Ser	207703	1871	O45657		plx-2	26.4	45.38	S1493	LADSGQSSWSSLDRC	13.33	20	Ser	195762	1766	74.6238	309.555	306.832	283.886	314.321	222.663
P17735 S348	TAT	P17735	NP_000344.1	S348	NTLSFLKSNADLCYG	Ser	50399	454		NP_510454	tatn-1	41.38	60.99	T351	YTRNVIETNANIVDS	20	60	Thr	51013	464	74.6151	173.246	206.433	162.481	182.416	129.173
P11413 T466	G6PD	P11413	NP_000393.4	T466	REAWRIFTPLLHQIE	Thr	59257	515	Q27464		gspd-1	58.81	74.9	T474	EYAWRILTPVLEELK	46.67	73.33	Thr	60197	522	74.5775	170.416	163.807	158.36	161.582	193.594
P39210 T53	MPV17	P39210	NP_002428.1	T53	HQRGRTLTMVSLGCG	Thr	19733	176	Q7YWV6		T18D3.9	32.6	52.49	S56	ARFSFLSSCFMAPSL	0	13.33	Ser	21290	181	74.5192	174.411	167.207	152.121	161.305	132.045
Q13394 Y166	MAB21L1	Q13394	NP_005575.1	Y166	KLRIRDRYVVQITPA	Tyr	40956	359	Q20054		mab-21	56.04	74.45	Y167	RVRVDDKYTVQITCA	53.33	80	Tyr	41504	364	74.5086	153.877	146.116	142.596	144.568	110.458
Q13574 S164	DGKZ	Q13574	NP_001099010.1	S164	RYLRRASSHLLPADA	Ser	124128	1117	Q10024		dgk-5	31.69	46.37	T80	EIVCDEFTKKLVAAI	13.33	26.67	Thr	105180	937	74.4992	278.03	250.006	254.776	246.148	209.864
Q494W8 T140	CHRFAM7A	Q494W8	NP_647536.1	T140	TVTMRRRTLYYGLNL	Thr	46218	412	P48180		acr-16	36.14	47.99	T229	YLHMRRRTLYYGFNL	73.33	80	Thr	57150	498	74.4912	165.24	156.817	158.07	159.215	151.193
Q16719 T365	KYNU	Q16719	NP_003928.1	T365	RKKSVLLTGYLEYLI	Thr	52352	465	Q18026		C15H9.7	47.49	66.74	T378	RSRSCYLTGYLEYLV	66.67	80	Thr	54031	478	74.4731	1.64154	28.5981	-17.11	25.0823	-34.8245
Q12889 S582	OVGP1	Q12889	NP_002548.3	S582	TVPSRNISVTPEGQT	Ser	75421	678	Q11174		cht-1	31.42	46.46	S527	SLKYCTTSTASGCSV	6.67	20	Ser	66839	617	74.4525	220.926	251.23	194.077	234.82	151.962
Q14206 Y84	RCAN2	Q14206	NP_005813.2	Y84	RGKKLKLYFAQVQTP	Tyr	21997	197	P53806		rcn-1	37.68	55.07	T84	FSSPENATAAKLIVQ	6.67	20	Thr	23012	207	74.4375	4.20936	13.3162	1.27074	2.29167	-39.8254
O75643 S1850	SNRNP200	O75643	NP_054733.2	S1850	RGLIEIISNAAEYEN	Ser	244508	2136	Q9U2G0		snrp-200	60.84	79.25	S1849	RALIEIISASSEFGN	60	80	Ser	243812	2145	74.4372	142.267	140.996	125.034	123.755	89.8653
Q12767 S683	KIAA0195	Q12767	NP_055553.3	S683	TKRRPPLSHMISLFI	Ser	151151	1356		NP_491390	D1007.15	24.48	42.33	S542	DDAKSLHSHLACQGT	13.33	26.67	Ser	133375	1184	74.4273	71.4375	72.5422	52.9862	73.0865	76.419
P61962 S38	DCAF7	P61962	NP_005819.3	S38	RFRLALGSFVEEYNN	Ser	38926	342		NP_506417	swan-2	46.03	58.16	S172	KFRLAVSSFIEEYSN	66.67	93.33	Ser	53177	478	74.4156	110.047	104.541	81.9653	102.992	33.8475
Q13243 S225	SFRS5	Q13243	NP_001034554.1	S225	RSRSRSRSKSRSVSR	Ser	31264	272	Q23121		rsp-1	50.32	65.06	S259	KSRSRSRSRSADNRK	53.33	73.33	Ser	35023	312	74.363	213.75	246.417	200.801	250.132	171.779
P58397 T970	ADAMTS12	P58397	NP_112217.2	T970	GVRIRSVTCAKNHDE	Thr	177676	1594	Q19791		gon-1	25.44	39.95	Y1030	GKMHRKSYCVDDSNR	20	33.33	Tyr	242563	2150	74.3484	164.454	179.235	157.572	167.121	129.854
A1L0T0 S359	ILVBL	A1L0T0	NP_006835.2	S359	TVCDFRLSYGRVLSH	Ser	67868	632	O61856		T26C12.1	53.91	69.84	S363	TVCDFRLSYGRTLSK	86.67	86.67	Ser	69245	640	74.3483	91.1994	78.7019	73.9887	93.042	71.1191
P82921 Y45	MRPS21	P82921	NP_061870.1	Y45	DIKHRRYYEKPCRRR	Tyr	10742	87		NP_500608	mrps-21	34.48	56.32	T42	KPYMQRKTLSMEAST	6.67	13.33	Thr	9149	78	74.2549	156.304	156.46	153.993	149.319	140.379
Q01433 S45	AMPD2	Q01433	NP_004028.3	S45	PSRCRSDSPAVAAVV	Ser	100688	879		NP_001040752	C34F11.3	46.87	60.98	T36	SPFEISTTPIEVNES	13.33	20	Thr	92339	803	74.2277	243.552	262.065	234.081	236.898	240.508
O15294 S20	OGT	O15294	NP_858058.1	S20	EPTKRMLSFQGLAEL	Ser	116925	1046	O18158		ogt-1	61.34	72.81	T124	VLNGVSETLKKVTEL	13.33	33.33	Thr	127993	1151	74.2025	257.221	240.823	217.765	231.255	177.738
O60285 S570	NUAK1	O60285	NP_055655.1	S570	RSYSRPSSVISDDSV	Ser	74305	661	Q9TW45		par-1	22.48	35.82	T736	AAGGTAATSSSSSSS	13.33	33.33	Thr	126331	1192	74.155	207.203	215.961	182.378	229.197	134.415
O15230 S2420	LAMA5	O15230	NP_005551.3	S2420	LQRKQELSRDNATLQ	Ser	399799	3695	Q21313		epi-1	31.64	48.85	T2379	ENLVAAITDDLERVE	6.67	33.33	Thr	404211	3672	74.1514	44.3643	40.7777	22.7545	41.3159	28.9729
Q14566 T127	MCM6	Q14566	NP_005906.2	T127	RHKIRELTSSRIGLL	Thr	92889	821	P34647		mcm-6	54.81	71.74	S126	KTKVRELSADKVGGL	40	80	Ser	91112	810	74.1495	111.72	98.6717	92.2859	98.0142	102.834
P11413 S184	G6PD	P11413	NP_000393.4	S184	LQSSDRLSNHISSLF	Ser	59257	515	Q27464		gspd-1	58.81	74.9	S190	LKSSCELSTHLAKLF	53.33	73.33	Ser	60197	522	74.1315	90.8658	121.994	83.377	117.467	102.782
Q0VDF9 S219	HSPA14	Q0VDF9	NP_057383.2	S219	SGIYRVLSTNTDDNI	Ser	54794	509	P09446		hsp-1	30.94	47.81	S222	DGIFEVKSTAGDTHL	40	60	Ser	69704	640	74.1106	191.966	173.289	167.853	173.271	134.473
B2RTY4 Y1056	MYO9A	B2RTY4	NP_008832.2	Y1056	IQRFWRNYLNQKQVR	Tyr	292778	2548	P91443		hum-6	21.78	40.11	Y670	YPIRHDYYPFVFRYR	13.33	20	Tyr	239766	2098	74.0959	32.535	32.7978	36.5458	36.3023	38.0437
P48050 T184	KCNJ4	P48050	NP_004972.1	T184	RPKKRAQTLLFSHHA	Thr	49500	445	P52192		irk-1	30.5	46.73	T223	RPKKRAETIIFSDKA	66.67	86.67	Thr	57401	505	74.0845	156.798	138.897	137.954	135.261	124.519
Q16825 S658	PTPN21	Q16825	NP_008970.2	S658	RLKERTLSASAAEVA	Ser	133281	1174	P28191		ptp-1	26.15	42.5	S584	NSVASYSSFASAGIG	13.33	33.33	Ser	115075	1026	74.0565	190.627	170.162	156.048	172.437	135.849
P35548 S130	MSX2	P35548	NP_002440.2	S130	SPPPRHTSPTTCTLR	Ser	28867	267	Q09604		vab-15	34.46	46.82	T108	SQREDSPTSDDAKIQ	6.67	26.67	Thr	25209	225	73.9715	234.476	201.579	210.514	205.104	211.041
P08572 Y134	COL4A2	P08572	NP_001837.2	Y134	GPRGRPGYDGCNGTQ	Tyr	167553	1712	P17139		emb-9	42.75	52.53	Y190	GLPGNSGYPGLKGAK	40	46.67	Tyr	171068	1759	73.8779	168.142	144.995	152.052	150.506	127.651
Q14416 S675	GRM2	Q14416	NP_000830.2	S675	AQRPRFISPASQVAI	Ser	95568	872	Q09630		mgl-1	39.94	55.66	S787	AQRPRFISPISQVVM	80	86.67	Ser	113258	999	73.874	239.048	236.197	224.15	228.734	233.254
P32856 S120	STX2	P32856	NP_001971.2	S120	RIRRTQHSVLSRKFV	Ser	33341	288	O16000		unc-64	53.95	71.13	S122	RIRKTQHSTLSRRFV	80	93.33	Ser	33234	291	73.8227	58.0367	60.9539	53.5481	62.4391	30.9923
P68363 S232	TUBA1B	P68363	NP_006073.2	S232	TNLNRLISQIVSSIT	Ser	50152	451	P34690		tba-2	88.25	94.9	S230	TNLNRIISQVVSSIT	86.67	100	Ser	49895	448	73.7879	311.989	288.907	284.387	281.314	248.839
P68366 S232	TUBA4A	P68366	NP_005991.1	S232	TNLNRLISQIVSSIT	Ser	49924	448	P34690		tba-2	87.28	94.64	S230	TNLNRIISQVVSSIT	86.67	100	Ser	49895	448	73.7879	311.989	288.907	284.387	281.314	248.839
P05062 S176	ALDOB	P05062	NP_000026.2	S176	NALARYASICQQNGL	Ser	39473	364	P46563		aldo-2	59.84	71.31	S179	NVLARYASICQANGL	86.67	86.67	Ser	38828	366	73.7498	313.768	273.051	285.444	277.338	238.257
O60333 T1295	KIF1B	O60333	NP_055889.2	T1295	QGIQRRITVTIIHEK	Thr	204476	1816	P23678		unc-104	49.34	64.26	T1100	IQRRIKITICHEKGE	13.33	40	Thr	179603	1584	73.7355	171.788	172.362	160.273	166.068	149.198
P49760 Y69	CLK2	P49760	NP_003984.2	Y69	RSSDRRVYDRRYCGS	Tyr	60090	499	Q9XTF3		mbk-2	20.44	34.52	S367	PKSPSNESLSRSHTS	20	20	Ser	89866	817	73.7301	153.582	123.88	128.017	145.692	169.187
P98160 S2108	HSPG2	P98160	NP_005520.4	S2108	RLRLPQVSPADSGEY	Ser	468798	4391	Q06561		unc-52	24.23	37.99	T1203	GQYRCTATTITQYAT	0	6.67	Thr	369033	3375	73.7279	88.9377	114.06	75.9437	94.0682	129.203
P00439 S137	PAH	P00439	NP_000268.1	S137	RFANQILSYGAELDA	Ser	51862	452	P90925		pah-1	55.36	71.77	S137	QFANRILSYGAELDA	86.67	100	Ser	52111	457	73.6962	49.667	32.0072	20.0019	35.8972	-2.99853
O14795 S1566	UNC13B	O14795	NP_006368.3	S1566	LTILRILSQRSNDEV	Ser	180679	1591	P27715		unc-13	43.48	56.24	S2117	LILLRILSQRQTDEV	73.33	80	Ser	245213	2155	73.6804	209.198	178.492	162.859	194.696	175.684
P53355 S289	DAPK1	P53355	NP_004929.2	S289	QALSRKASAVNMEKF	Ser	160073	1430		NP_490840	dapk-1	34.55	54.48	S303	AIDIRKASCITISHI	26.67	40	Ser	158950	1425	73.6747	327.415	324.747	298.515	318.272	246.777
P49619 S735	DGKG	P49619	NP_001074213.1	S735	RRLAQCASVTIRTNK	Ser	89096	791	Q03603		dgk-3	46.06	63.3	T736	RRLSQCSTVVIQTHK	60	93.33	Thr	91362	812	73.6333	149.471	120.612	132.593	129.664	105.926
P42575 Y444	CASP2	P42575	NP_116764.2	Y444	STLCRHLYLFPGHPP	Tyr	50685	452	P42573		ced-3	25.25	42.35	Y493	SRLLKKFYFWPEARN	26.67	40	Tyr	56598	503	73.5626	251.284	222.109	231.708	217.724	193.394
P29973 S567	CNGA1	P29973	NP_000078.2	S567	RRTANIKSIGYSDLF	Ser	79586	690	Q03611		tax-4	42.29	57.57	S581	RRTANVRSVGYTDLF	73.33	100	Ser	83874	733	73.5466	37.2589	33.7715	24.7319	39.5087	43.1257
O60285 S600	NUAK1	O60285	NP_055655.1	S600	PARQRIRSCVSAENF	Ser	74305	661	Q9TW45		par-1	22.48	35.82	S818	QQQQKASSETPKESK	20	40	Ser	126331	1192	73.5238	211.229	197.623	189.021	199.375	157.54
Q15287 S289	RNPS1	Q15287	NP_006702.1	S289	PVRRRSRSPGRRRHR	Ser	34208	305	Q09511		rsp-4	21.97	32.46	S181	PKERRSRSRSASRSP	46.67	46.67	Ser	22569	196	73.4657	246.25	248.425	234.85	245.956	278.839
P25705 Y337	ATP5A1	P25705	NP_001001937.1	Y337	RPPGREAYPGDVFYL	Tyr	59751	553	Q9XXK1		H23O16.1	79.2	88.79	Y322	RPPGREAYPGDVFYL	100	100	Tyr	57769	538	73.4501	181.618	145.436	158.913	152.015	191.288
P25705 T264	ATP5A1	P25705	NP_001001937.1	T264	AQLVKRLTDADAMKY	Thr	59751	553	Q9XXK1		H23O16.1	79.2	88.79	T249	AQIVKRLTDAGAMDY	80	86.67	Thr	57769	538	73.4351	117.002	108.001	116.399	100.127	94.0247
P42336 S161	PIK3CA	P42336	NP_006209.2	S161	RDLNSPHSRAMYVYP	Ser	124284	1068	Q94125		age-1	26.73	46.79	S259	KVKAAKLSYQMFWRK	13.33	33.33	Ser	136855	1182	73.4123	133.999	127.439	130.527	116.194	100.386
P62750 Y60	RPL23A	P62750	NP_000975.2	Y60	RLRRQPKYPRKSAPR	Tyr	17695	156	Q20647		rpl-25.2	62.18	73.72	Y50	VTARAPRYARKSAPA	53.33	60	Tyr	16265	146	73.4086	50.0296	34.515	24.3408	54.3898	156.57
P29144 S919	TPP2	P29144	NP_003282.2	S919	HRLSNTLSLDIHENH	Ser	138350	1249	Q09541		tpp-2	35.08	53.42	S975	VKLGNKISVDLAASA	26.67	60	Ser	151070	1374	73.3925	208.191	211.792	177.933	215.066	175.78
Q64LD2 T338	WDR25	Q64LD2	NP_001154948.1	T338	RSDFRITTLKFHPKD	Thr	60161	544	Q23256		wdr-5.3	20.96	39.15	Y299	TMRGHTNYVFCCSFN	0	13.33	Tyr	54455	501	73.3181	132.328	115.574	127.023	121.352	116.965
P30876 S1111	POLR2B	P30876	NP_000929.1	S1111	RERLFEASDPYQVHV	Ser	133897	1174	Q10578		rpb-2	77.87	88.85	S1117	RERLFEVSDPYHVYV	80	86.67	Ser	134886	1193	73.2699	47.5341	49.3223	35.4286	44.4949	25.7018
P07101 S487	TH	P07101	NP_000351.2	S487	SRIQRPFSVKFDPYT	Ser	58600	528	P90925		pah-1	40.72	59.28	Y417	FQIRYNAYTQRVEIL	6.67	26.67	Tyr	52111	457	73.1897	203.641	188.9	187.425	198.485	192.755
O75914 S524	PAK3	O75914	NP_001121638.1	S524	MDVDRRGSAKELLQH	Ser	62310	559	Q17850		pak-1	50.87	65.03	S536	VQVENRWSASQLLTH	46.67	66.67	Ser	63863	572	73.1357	213.632	202.908	200.816	200.626	203.363
Q13813 Y463	SPTAN1	Q13813	NP_001123910.1	Y463	WELRRQQYEQCMDLQ	Tyr	284539	2472		NP_508537	K10B3.10	58.58	75.16	Y480	WEERRILYEQCMDLQ	80	80	Tyr	281735	2427	73.1119	263.78	229.208	246.26	231.598	211.35
O60909 Y228	B4GALT2	O60909	NP_001005417.1	Y228	PMDDRNLYRCGDQPR	Tyr	41972	372	Q9GUM2		bre-4	37.08	56.4	Y232	PEDDRNLYTCPIQPR	73.33	73.33	Tyr	43895	383	73.0844	162.413	123.841	132.587	135.003	112.155
P24043 S2701	LAMA2	P24043	NP_000417.2	S2701	MDFARPVSFKNADIG	Ser	343905	3122	Q18823		lam-2	20.21	31.33	Y1173	AYNASQKYGEQSKRM	6.67	20	Tyr	170219	1535	72.996	243.487	231.47	228.52	232.645	175.643
O75312 S36	ZNF259	O75312	NP_003895.1	S36	DHLFRPISAEDEEQQ	Ser	50925	459	O16999		W03F9.1	41.18	61.44	T42	GETRIMCTSIPYYRA	0	20	Thr	50911	455	72.9874	305.644	271.327	275.236	275.998	238.315
P51911 Y268	CNN1	P51911	NP_001290.2	Y268	YGLPRQVYDPKYCLT	Tyr	33170	297	P37806		unc-87	22.83	33.98	T497	FGTCRNTTFEAEGGE	13.33	20	Thr	62709	565	72.9385	266.159	224.231	245.635	230.165	204.026
Q14165 S80	MLEC	Q14165	NP_055545.1	S80	EGRVGRASDYGMKLP	Ser	32234	292		NP_498951	F44E2.10	32.24	53.95	S73	TSEDGVSSDHGMQYS	33.33	53.33	Ser	33890	304	72.938	76.2712	77.7604	64.7078	74.7819	54.1668
Q13243 S223	SFRS5	Q13243	NP_001034554.1	S223	RSRSRSRSRSKSRSV	Ser	31264	272	Q23121		rsp-1	50.32	65.06	S257	KSKSRSRSRSRSADN	60	80	Ser	35023	312	72.9091	216.787	243.121	196.149	250.078	157.541
Q05655 S645	PRKCD	Q05655	NP_006245.2	S645	LNEKARLSYSDKNLI	Ser	77505	676	P34722		tpa-1	47.16	64.77	T676	TNEKAALTPVHDKNL	33.33	46.67	Thr	80280	704	72.8648	49.8641	43.2481	40.9537	44.9097	31.2444
O15530 T479	PDPK1	O15530	NP_002604.1	T479	RRRQLLLTEGPHLYY	Thr	63152	556	Q9Y1J3		pdk-1	32.55	52.2	T502	RRRMFLLTEGPHLLY	80	80	Thr	71898	636	72.8279	3.4102	14.8841	-10.8306	9.76669	-5.89482
A2PYH4 S673	HFM1	A2PYH4	NP_001017975.3	S673	AVIMTRLSTRDKYIQ	Ser	162610	1435	Q9U2G0		snrp-200	21.96	37.81	S867	GILITNHSELQYYLS	20	46.67	Ser	243812	2145	72.7886	79.6861	62.7068	60.5176	80.5016	96.5114
Q14642 S310	INPP5A	Q14642	NP_005530.3	S310	LEFDKELSVFKDRLY	Ser	47820	412	Q17848		ipp-5	29.37	49.76	T330	YRDDDKETENFQSMF	6.67	33.33	Thr	47583	409	72.7321	53.9338	41.2436	28.2511	41.6724	15.9587
P50851 S1299	LRBA	P50851	NP_006717.2	S1299	VNGQRRDSRSTVFRI	Ser	319108	2863	Q19317		sel-2	30.81	49.46	S1024	DTLAIAHSKVSFEKF	6.67	26.67	Ser	281187	2507	72.7284	210.031	195.269	199.592	198.594	166.693
Q13243 S192	SFRS5	Q13243	NP_001034554.1	S192	RSRSRSRSRTRSSSR	Ser	31264	272	Q23121		rsp-1	50.32	65.06	S226	RSRDRRRSRSRSSSR	80	86.67	Ser	35023	312	72.7176	216.911	249.536	201.702	253.226	174.307
P78412 S375	IRX6	P78412	NP_077311.2	S375	PARPRPRSPECRMIP	Ser	48240	446	Q93348		irx-1	24.66	39.24	T319	DPTLFRHTMHPFMFQ	6.67	13.33	Thr	40765	377	72.6908	251.415	235.874	229.657	236.677	262.401
O15484 S617	CAPN5	O15484	NP_004046.2	S617	LHLRDRNSRQPSNLP	Ser	73169	640	Q22036		tra-3	40.12	57.25	T621	DNENRDTTLQLTDPR	6.67	33.33	Thr	73596	648	72.6853	180.016	168.712	177.038	161.583	188.531
A1KZ92 Y1234	PXDNL	A1KZ92	NP_653252.3	Y1234	RDGDRFWYENPGVFT	Tyr	163654	1463	Q1ENI8		pxn-1	32.47	49.28	S1068	SRDHGLPSYTEYRKF	0	0	Ser	146318	1285	72.6032	153.345	134.991	133.047	133.318	111.574
P29074 Y815	PTPN4	P29074	NP_002821.1	Y815	RPLTQIQYIAWPDHG	Tyr	105911	926	P28191		ptp-1	41.13	59.06	Y915	RRVTQMQYIAWPDHG	80	93.33	Tyr	115075	1026	72.6012	96.6246	72.5244	93.2638	68.3456	58.1063
P28482 S29	MAPK1	P28482	NP_002736.3	S29	GPRYTNLSYIGEGAY	Ser	41390	360	P39745		mpk-1	64.41	70.95	S100	APRYVNLSYIGEGAY	86.67	86.67	Ser	50644	444	72.5534	81.9903	65.5127	60.2086	70.9314	25.0292
P36954 Y112	POLR2I	P36954	NP_006224.1	Y112	EDAMRLYYVCTAPHC	Tyr	14523	125		NP_505062	rpb-9	47.9	61.08	Y154	EEEMRLYYVCASQDC	60	73.33	Tyr	19316	167	72.545	151.963	134.971	136.413	142.261	140.857
O95342 S1036	ABCB11	O95342	NP_003733.2	S1036	TALGRAFSYTPSYAK	Ser	146407	1321	P34712		pgp-1	38.3	58.21	S1036	STLGFATSYFPEYAK	60	66.67	Ser	145045	1321	72.5159	303.567	286.588	281.717	270.609	250.427
P0C1H6 S158	H2BFM	P0C1H6	XP_001723489.1	S158	HANRRGDSFGDSFTP	Ser	28267	257	Q27876		his-48	27.63	37.74	Y35	RHARKESYSVYIYRV	6.67	20	Tyr	13567	123	72.4562	237.209	245.415	222.431	223.627	179.649
P49454 S2005	CENPF	P49454	NP_057427.3	S2005	NELSRIRSEKASIEH	Ser	367764	3210	P02566		unc-54	20.12	36.45	S905	SLFTNLESTKTQLSD	13.33	40	Ser	225108	1966	72.454	329.743	339.762	305.503	326.745	277.393
P11021 T473	HSPA5	P11021	NP_005338.1	T473	YEGERPLTKDNHLLG	Thr	72333	654	P27420		hsp-3	77.46	88.8	T478	FEGERPMTKDNHQLG	80	93.33	Thr	73005	661	72.4286	153.457	138.696	125.585	137.73	150.704
P68431 S87	HIST1H3A	P68431	NP_003520.1	S87	KTDLRFQSSAVMALQ	Ser	15404	136	P08898		his-17	97.79	99.26	S87	KTDLRFQSSAVMALQ	100	100	Ser	15357	136	72.4201	183.435	190.315	162.46	165.795	122.277
Q16695 S87	HIST3H3	Q16695	NP_003484.1	S87	KTDLRFQSSAVMALQ	Ser	15508	136	P08898		his-17	94.85	97.79	S87	KTDLRFQSSAVMALQ	100	100	Ser	15357	136	72.4201	183.435	190.315	162.46	165.795	122.277
O95475 Y71	SIX6	O95475	NP_031400.2	Y71	GGNYRELYHILENHK	Tyr	27687	246	Q23175		ceh-32	35.08	42.14	Y128	ASHFRELYAILENNK	60	80	Tyr	49618	439	72.4136	140.405	148.034	122.001	127.573	110.03
P30679 S341	GNA15	P30679	NP_002059.2	S341	ARSRRLFSHYTCATD	Ser	43508	374	Q9N2V6		gpa-16	44.39	61.23	T324	EKNQEIYTQFTCATD	33.33	80	Thr	41310	357	72.394	190.508	179.764	165.565	186.338	153.699
Q16654 S312	PDK4	Q16654	NP_002603.1	S312	RLFSYTYSTAPTPVM	Ser	46469	411	Q02332		pdhk-2	47.69	65.94	Y304	ERLYNYMYSTAPPPP	6.67	13.33	Tyr	45263	401	72.3848	84.2723	136.259	72.3348	108.832	59.3469
Q16630 S500	CPSF6	Q16630	NP_008938.2	S500	RSRERDHSRSREKSR	Ser	59210	551		NP_501551	cfim-2	31.76	45.92	T438	LVYGLEHTLKGLESK	13.33	40	Thr	53643	489	72.3684	200.286	192.65	170.863	197.31	139.894
O43776 Y393	NARS	O43776	NP_004530.1	Y393	RPFKRMNYSDAIVWL	Tyr	62943	548	Q19722		nars-1	58.39	72.99	Y390	RPFKRMPYKEAIEWL	73.33	80	Tyr	61167	545	72.3678	147.225	119.052	126.849	125.479	123.533
P38606 S111	ATP6V1A	P38606	NP_001681.2	S111	RPLSDISSQTQSIYI	Ser	68304	617	Q9XW92		vha-13	79.9	89.14	Y106	ADITQSIYIPKGVST	0	26.67	Tyr	66441	606	72.3271	189.414	187.822	181.035	188.218	158.339
P68400 Y50	CSNK2A1	P68400	NP_001886.1	Y50	RKLGRGKYSEVFEAI	Tyr	45144	391	P18334		kin-3	72.89	82.35	T60	FEGFKMSTDEKVVVK	6.67	20	Thr	42239	360	72.3196	216.627	191.651	198.972	186.986	170.375
P19784 Y51	CSNK2A2	P19784	NP_001887.1	Y51	RKLGRGKYSEVFEAI	Tyr	41213	350	P18334		kin-3	75	86.11	T60	FEGFKMSTDEKVVVK	6.67	20	Thr	42239	360	72.3196	216.627	191.651	198.972	186.986	170.375
Q16832 Y736	DDR2	Q16832	NP_001014796.1	Y736	FGMSRNLYSGDYYRI	Tyr	96736	855		NP_508572	ddr-2	32.87	52.05	Y671	FGMARSLYSQEYYKV	60	93.33	Tyr	90284	797	72.2956	157.566	174.604	140.467	170.959	113.329
Q13136 Y1029	PPFIA1	Q13136	NP_003617.1	Y1029	MCLRRLNYDRKELER	Tyr	135779	1202	Q21049		syd-2	44.34	60.48	Y969	PCLGLAQYRSAFMEC	26.67	33.33	Tyr	130316	1139	72.2051	280.174	233.39	226.453	250.043	246.712
Q6ICG6 S87	C22orf9	Q6ICG6	NP_001009880.1	S87	VEVYRRDSKKLPGLG	Ser	45794	404		NP_509174	C16E9.2	32.39	46.61	S131	LQVFRRHSKNQPTPC	40	60	Ser	52582	457	72.15	204.063	193.151	196.456	190.013	166.851
Q02543 T101	RPL18A	Q02543	NP_000971.1	T101	YREYRDLTTAGAVTQ	Thr	20762	176	O44480		rpl-20	61.67	77.22	T104	YREYRDTTVAGAVTQ	86.67	86.67	Thr	20941	180	72.1187	150.285	140.509	136.413	137.061	116.749
P07942 S745	LAMB1	P07942	NP_002282.2	S745	RCLENSRSVVKTPMT	Ser	198066	1786	Q18823		lam-2	26.93	44.23	T572	YNQDLVFTLKVAKHV	0	20	Thr	170219	1535	72.1081	165.863	153.835	157.769	156.487	134.01
P53618 S933	COPB1	P53618	NP_001137533.1	S933	HIRIRAKSQGMALSL	Ser	107142	953		NP_494441	Y25C1A.5	60.14	75.8	S942	HIRIRAKSQGMCLTL	86.67	93.33	Ser	107512	971	72.0987	223.579	215.769	198.304	218.085	164.717
P08069 S1278	IGF1R	P08069	NP_000866.1	S1278	EPGFREVSFYYSEEN	Ser	154793	1367	Q968Y9		daf-2	27.03	41.55	S1532	SPEFRDLSFVLTDNQ	33.33	60	Ser	207106	1846	72.0913	254.191	234.433	220.956	232.258	199.89
P40426 S211	PBX3	P40426	NP_001128250.1	S211	GIIHRKFSSIQMQLK	Ser	47190	434	P41779		ceh-20	48.39	60.37	Y116	LHQIRVLYNEELRKY	6.67	33.33	Tyr	38136	338	72.066	187.183	171.86	170.15	173.15	131.757
Q13243 S221	SFRS5	Q13243	NP_001034554.1	S221	RSRSRSRSRSRSKSR	Ser	31264	272	Q23121		rsp-1	50.32	65.06	S255	ESKSKSRSRSRSRSA	66.67	86.67	Ser	35023	312	72.0319	211.629	249.376	198.133	248.011	171.173
P58872 S106	RHBDL3	P58872	NP_612201.1	S106	MSNKRSNSFRQAILQ	Ser	45245	404	Q19821		rom-1	26.98	49.5	T77	SKAAQRSTIKRIMYD	0	40	Thr	40615	356	72.0284	244.589	247.052	216.415	241.31	179.689
Q04725 Y505	TLE2	Q04725	NP_001138233.1	Y505	DCLNRDNYIRSCKLL	Tyr	79841	743	O02482		unc-37	38.63	53.43	S379	LKENYIRSCKLFEDG	6.67	20	Ser	65598	612	72.0243	267.875	209.001	237.138	233.383	231.476
P24723 S637	PRKCH	P24723	NP_006246.2	S637	PFRPRIKSREDVSNF	Ser	77828	683	P34885		pkc-1	55.02	71.85	S661	PFKPKIKSKRDANNF	60	86.67	Ser	80133	707	71.9802	226.034	197.833	187.535	200.466	153.104
P15291 S270	B4GALT1	P15291	NP_001488.2	S270	FSQPRHISVAMDKFG	Ser	43920	398	Q9GUM2		bre-4	36.43	55.53	S242	PIQPRHMSVAIDKFN	66.67	80	Ser	43895	383	71.9778	188.254	194.495	174.06	174.907	131.637
O75533 Y561	SF3B1	O75533	NP_036565.2	Y561	KVIDRILYKLDDLVR	Tyr	145830	1304		NP_497853	T08A11.2	65.13	76.7	Y579	KVIDRILYKLDDLVR	100	100	Tyr	147305	1322	71.9643	142.522	114.775	118.865	123.188	99.4003
O15178 S288	T	O15178	NP_003172.1	S288	TLRSHRSSPYPSPYA	Ser	47443	435	Q19691		tbx-2	31.49	48.97	S277	TASLPTHSPHPSESN	33.33	40	Ser	46979	423	71.938	130.64	179.564	126.851	165.405	198.201
P30876 Y615	POLR2B	P30876	NP_000929.1	Y615	REREIRIYTDAGRIC	Tyr	133897	1174	Q10578		rpb-2	77.87	88.85	Y621	RDREIRIYTDAGRVC	86.67	100	Tyr	134886	1193	71.9003	12.7834	21.1249	12.4038	20.5988	39.8361
P10586 Y1589	PTPRF	P10586	NP_002831.2	Y1589	CMRSQRNYMVQTEDQ	Tyr	212879	1907	Q9BMN8		ptp-3	34.27	50.27	Y1884	ALRAQRSYMVQTEEQ	66.67	93.33	Tyr	246601	2200	71.8983	51.3049	93.9927	53.8416	86.7727	48.1207
Q13454 S331	TUSC3	Q13454	NP_006756.2	S331	FFFSFLLSIFRSKYH	Ser	39676	348	P34669		ZK686.3	45.11	66.09	S315	VFFSFLLSVFRSKYR	80	86.67	Ser	37670	331	71.8928	108.682	136.022	81.0565	124.672	84.1714
P43354 S347	NR4A2	P43354	NP_006177.1	S347	GRRGRLPSKPKSPQE	Ser	66591	598	P41829		nhr-6	27.14	42.33	S352	GRRGRLSSKTKLARS	60	66.67	Ser	68604	619	71.872	218.619	206.199	194.951	214.643	221.399
P05771 Y417	PRKCB	P05771	NP_002729.2	Y417	FQTMDRLYFVMEYVN	Tyr	76869	671	P90980		pkc-2	65.84	78.89	Y423	FQTMDRLYFVMEFVN	93.33	100	Tyr	77982	682	71.8443	77.5524	81.4411	78.6942	79.0461	63.4858
Q13562 S177	NEUROD1	Q13562	NP_002491.2	S177	QTLCKGLSQPTTNLV	Ser	39890	356	P46581		cnd-1	26.69	37.64	S15	NFAPAEISKRKVRRV	13.33	26.67	Ser	21827	192	71.7452	150.847	120.999	135.13	125.63	93.9345
P08912 T137	CHRM5	P08912	NP_036257.1	T137	FSITRPLTYRAKRTP	Thr	60074	532	Q9U7D5		gar-3	32.41	50.25	S172	FSVTRPLSYRPRRTT	66.67	86.67	Ser	69544	611	71.7071	153.041	120.745	119.654	139.923	159.404
P49760 S402	CLK2	P49760	NP_003984.2	S402	RILGPIPSRMIRKTR	Ser	60090	499	Q9XTF3		mbk-2	20.44	34.52	S697	RARTFITSKGYPRYC	20	33.33	Ser	89866	817	71.7052	136.2	119.66	134.031	118.907	105.723
P42336 T624	PIK3CA	P42336	NP_006209.2	T624	RCLEKYLTDDKLSQY	Thr	124284	1068	Q94125		age-1	26.73	46.79	S711	EKLNEQLSPVTFHLF	13.33	33.33	Ser	136855	1182	71.6442	112.736	94.8071	89.8317	91.6508	101.085
